1  
2  
3  
4  
5  
6  
7  
8  
9  
10  
11  
12  
13  
14  
15  
16  
17  
18  
19  
20  
21  
22  
23  
24  
25  
26  
27  
28  
29  
30  
31  
32  
33  
34  
35  
36  
37  
38  
39  
40  
41  
42  
43  
44  
45

**Positive reward prediction errors strengthen incidental memory encoding**

Anthony I. Jang<sup>1\*</sup>, Matthew R. Nassar<sup>1\*</sup>, Daniel G. Dillon<sup>2,3</sup> and Michael J. Frank<sup>1</sup>

<sup>1</sup>Department of Cognitive, Linguistic, and Psychological Sciences; Brown Institute for Brain Science, Brown University, Providence RI 02912-1821

<sup>2</sup>Center for Depression, Anxiety and Stress Research, McLean Hospital, Belmont MA 02478

<sup>3</sup>Harvard Medical School, Boston MA 02115

\* Authors contributed equally and are listed alphabetically

Corresponding Author:  
Matthew R. Nassar  
Department of Cognitive, Linguistic and Psychological Sciences  
Brown University  
Providence, RI 02912-1821  
Phone: 607-316-4932  
E-mail: [matthew\\_nassar@brown.edu](mailto:matthew_nassar@brown.edu)

1 **Abstract**

2

3

4 The dopamine system is thought to provide a reward prediction error signal that facilitates  
5 reinforcement learning and reward-based choice in corticostriatal circuits. While it is believed  
6 that similar prediction error signals are also provided to temporal lobe memory systems, the  
7 impact of such signals on episodic memory encoding has not been fully characterized. Here we  
8 develop an incidental memory paradigm that allows us to 1) estimate the influence of reward  
9 prediction errors on the formation of episodic memories, 2) dissociate this influence from other  
10 factors such as surprise and uncertainty, 3) test the degree to which this influence depends on  
11 temporal correspondence between prediction error and memoranda presentation, and 4)  
12 determine the extent to which this influence is consolidation-dependent. We find that when  
13 choosing to gamble for potential rewards during a primary decision making task, people  
14 encode incidental memoranda more strongly even though they are not aware that their  
15 memory will be subsequently probed. Moreover, this strengthened encoding scales with the  
16 reward prediction error, and not overall reward, experienced selectively at the time of  
17 memoranda presentation (and not before or after). Finally, this strengthened encoding is  
18 identifiable within a few minutes and is not substantially enhanced after twenty-four hours,  
19 indicating that it is not consolidation-dependent. These results suggest a computationally and  
20 temporally specific role for putative dopaminergic reward prediction error signaling in memory  
21 formation.

22

23

## 1 Introduction

2  
3  
4 Behaviors are often informed by multiple kinds of memories. For example, a decision  
5 about what to eat for lunch might rely on average preferences that have been slowly  
6 learned over time and that aggregate over many previous experiences, but it might also  
7 be informed by specific, temporally precise memories (e.g., ingredients seen in the  
8 fridge on the previous day). These different kinds of memories prioritize different  
9 aspects of experience. For example, reinforcement learning typically aggregates  
10 information across relevant experience to form general preferences that are used guide  
11 behavior <sup>1</sup>, whereas episodic memories allow access to details about specific,  
12 previously experienced events or scenes with limited interference from other similar  
13 ones. Computational modeling suggests that these two kinds of memories have different  
14 representational requirements and are likely subserved by anatomically distinct brain  
15 systems <sup>2-4</sup>. In particular, a broad array of evidence suggests that reinforcement  
16 learning is implemented through cortico-striatal circuitry in the prefrontal cortex and  
17 basal ganglia <sup>5-8</sup> whereas episodic memory appears to be reliant on synaptic changes in  
18 medial temporal structures, especially the hippocampus <sup>1,9-12</sup>.

19  
20 While the distinct anatomy of these systems allows them to operate over different  
21 representations, they are not independent. Medial temporal regions provide direct inputs  
22 into striato-cortical regions <sup>2,3,13-15</sup> and both regions receive shared information through  
23 common intermediaries <sup>5-8,16</sup>. Furthermore, both systems receive neuromodulatory  
24 inputs that undergo context dependent fluctuations that can affect synaptic plasticity and  
25 alter information processing in both systems <sup>17,18</sup>. Recent work in computational  
26 neuroscience has highlighted potential roles for two neuromodulators, dopamine and  
27 norepinephrine, in implementing and optimizing reinforcement learning in a changing  
28 world. In particular, dopamine is thought to supply a reward prediction error (RPE)  
29 signal that gates Hebbian plasticity in the striatum, facilitating repetition of rewarding  
30 actions <sup>5,6,19,20</sup>. In untrained animals dopamine prediction error signals are observed in  
31 response to primary rewards, but with experience dopamine signals precede to the  
32 earliest cue predicting future reward <sup>5</sup>. Such cue-induced dopamine signals are thought  
33 to serve a motivational role <sup>21</sup>, biasing behavior toward the effortful and risky actions  
34 that could allow for acquisition of the upcoming reward <sup>22-27</sup>. In contrast, norepinephrine  
35 has been proposed to provide a salience signal that amplifies overall learning from  
36 surprising events, irrespective of valence, or during periods of uncertainty <sup>28-30</sup>. In many  
37 experimental tasks, such a salience signal would look very similar to a reward prediction  
38 error signal, but careful experimental design can result in their dissociation <sup>31</sup>.

39  
40 While normative roles for dopamine and norepinephrine have frequently been discussed  
41 in terms of their effects on reinforcement learning and motivational systems, such  
42 signals likely also affect processing in medial temporal memory systems <sup>32-35</sup>. For  
43 example, dopamine can enhance LTP <sup>36</sup> and replay <sup>37</sup> in the hippocampus, which could  
44 potentially provide a mechanism to prioritize behaviorally relevant information for longer

1 term storage<sup>32</sup>. More recent work using optogenetics to perturb hippocampal dopamine  
2 inputs revealed a biphasic relationship, whereby low levels of dopamine suppress  
3 hippocampal information flow but higher levels of dopamine facilitate it<sup>35</sup>. Given that the  
4 highest levels of dopamine are typically elicited by dopamine bursts<sup>38</sup>, especially with  
5 larger reward prediction errors<sup>5</sup>, this result suggests that memory encoding in the  
6 hippocampus might be enhanced for unexpectedly positive events.

7  
8 However, despite relatively strong evidence that dopaminergic projections signal reward  
9 prediction errors<sup>5,39</sup>, and that dopamine release in the hippocampus can facilitate  
10 memory encoding in non-human animals<sup>40</sup>, evidence for a positive effect of reward  
11 prediction errors on memory formation in humans is scarce. Monetary incentives and  
12 reward expectation can be manipulated to improve episodic encoding, even of incidental  
13 memories, but it is not clear that such effects are driven by reward prediction errors  
14 rather than motivational signals or reward value per se<sup>18,33,41,42</sup>. The few studies that  
15 have closely examined the relationship between reward prediction error signaling and  
16 episodic memory have not found evidence for a memory advantage after positive  
17 prediction errors<sup>43,44</sup>. However, there are a number of technical factors that could mask  
18 a relationship between reward prediction errors and incidental memory formation in  
19 standard paradigms. For instance, such tasks typically have not controlled for salience  
20 signals, such as surprise and uncertainty, that can be closely related to RPEs, and that  
21 are thought to exert independent effects on episodic encoding through a separate  
22 noradrenergic neuromodulatory system<sup>28-30,45</sup>.

23  
24 Here we combine a novel behavioral paradigm with computational modeling to clarify  
25 the impact of prediction error and surprise, elicited during reinforcement learning, on  
26 episodic encoding. Our paradigm required subjects to encode images in the context of a  
27 learning and decision-making task, and then to complete a surprise recognition  
28 memory test for the images. The decision-making task required subjects to decide  
29 whether to accept or reject a risky gamble based on the value of potential payouts and  
30 the reward probabilities associated with two image categories, which they learned  
31 incrementally based on trial-by-trial feedback. Our design allowed us to measure and  
32 manipulate reward prediction errors at multiple timepoints and to dissociate those RPEs  
33 from other computational factors that are often correlated with them. In particular, our  
34 paradigm and computational models allowed us to manipulate and measure surprise  
35 and uncertainty, which have also been implicated in learning and episodic encoding,  
36 and are often closely related to RPEs in many tasks. However, both surprise and  
37 uncertainty are thought to be conveyed through noradrenergic modulation (rather than  
38 dopamine, which is thought to reflect RPE). We also assessed the degree to which  
39 relationships between these computations and episodic encoding depend on  
40 consolidation by testing recognition memories either immediately after the decision task  
41 or after a 24 hour delay.

42  
43 Our results reveal that subjects were more likely to remember images presented in trials  
44 in which they accepted the risky gamble. Moreover, the degree of this memory benefit

1 increased with the RPE experienced at the time of image presentation, but not by the  
2 RPE, surprise, or uncertainty associated with either the previous or subsequent trial  
3 outcome. These results were replicated in an independent sample, which also  
4 demonstrated sensitivity to counterfactual information about choices the participants did  
5 not make. Collectively, these data demonstrate a key role for reward prediction errors in  
6 episodic encoding, clarify the timescale and computational nature of interactions  
7 between reinforcement learning and encoding, and make testable predictions about the  
8 neuromodulatory mechanisms underlying both processes.

## 11 Results

13 The goal of this study is to elucidate how computational factors that govern trial-to-trial  
14 learning and decision-making might impact episodic memory encoding and retrieval. To  
15 do so, we designed a two-part task that included a learning and decision-making phase  
16 (Fig 1a) followed by a recognition memory phase (Fig 1c) (see Methods for additional  
17 details regarding the task, participants, and analysis). During the learning phase, on  
18 each trial subjects decided whether to accept (“play”) or reject (“pass”) an opportunity to  
19 gamble based on the potential reward payout. The magnitude of the potential reward  
20 was revealed numerically at the start of each trial, but its probability had to be learned  
21 via feedback. Subjects were presented with a visual image and were told that the  
22 probabilities of reward would depend on whether the (trial-unique) image belonged to  
23 one of two categories (animate or inanimate). The reward probability was yoked across  
24 categories, such that  $p(\text{animate}) = 1 - p(\text{inanimate})$ . On each trial, the subject integrated  
25 information about the trial payout (selected at random independently for each trial) and  
26 learned probability in order to decide whether to “play” or “pass” (Fig 1a). Furthermore,  
27 sequential presentation of value, probability and trial outcome information allowed us to  
28 manipulate subject reward expectations dynamically within a trial to separately elicit  
29 reward prediction errors before, during, and after image presentation (Fig 1b).

31 The learning phase thus presented subjects with a series of unique stimuli (images from  
32 animate/inanimate categories) in a context that allowed for the statistical dissociation of  
33 three computational factors thought to govern learning from feedback: prediction error,  
34 surprise, and uncertainty. Dissociation of these three factors was achieved in part  
35 through the independent manipulation of reward probability and value, and in part  
36 through occasional change points in the assignments of the yoked reward probabilities  
37 to each of the two image categories (Fig 1d; <sup>46</sup>). This design yielded estimates of  
38 surprise from an ideal observer model that spiked at improbable outcomes, including—  
39 but not limited to—those observed after changes in the reward probabilities (Fig 1e).  
40 Estimates of uncertainty changed more gradually and tended to be highest during  
41 periods following surprise (i.e., when the reward outcomes are volatile, one becomes  
42 more uncertain about the learned probability; Fig 1f). Reward prediction errors at time of  
43 feedback were highly variable across trials and more related to the probabilistic (and  
44 bivalent) trial outcomes than to transitions in the reward structure (Fig 1g).

1 While repeated-choice bandit tasks typically involve a prediction error at time of  
 2 feedback, our task also provided some information about the probability of a rewarding  
 3 outcome during the decision phase, coincident with the image presentation. This  
 4 allowed us to examine the effects of a separate, image reward prediction error  
 5 (Fig 1b). On some trials, the presented image category was associated with a higher-  
 6 than-expected reward probability leading to a positive image reward prediction error,  
 7 whereas on other trials the presented image suggested a lower than expected reward  
 8 probability leading to a negative image prediction error (Fig 1h). The image prediction  
 9 errors could be thought of as the dopamine signal that would be expected to occur in  
 10 response to the probabilistic reward cue provided by the memoranda themselves.  
 11  
 12

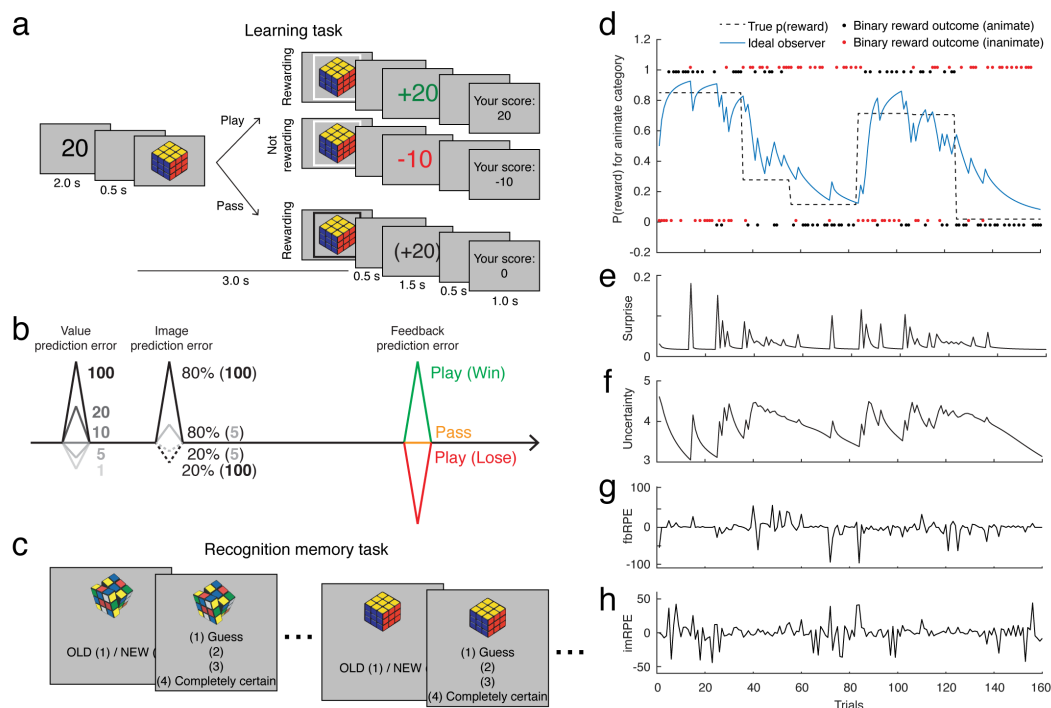

13  
 14  
 15 **Figure 1:** Dissociating effects of reward prediction error, surprise and uncertainty on incidental memory  
 16 encoding. **a**, In the learning task subjects were informed about the potential value of a successful gamble  
 17 for the current trial (two seconds, 20 for example trial) and then shown a unique image belonging to one  
 18 of two categories (animate/inanimate) for a total of three seconds, during which the subject would decide  
 19 whether to accept (“play”) or reject (“pass”) the gamble. After a brief delay, subjects were informed about  
 20 their earnings and, if they rejected the gamble, saw counterfactual information regarding the trial outcome.  
 21 At the end of each trial a cumulative total score was displayed. **b**, The learning task facilitates the  
 22 manipulation of reward prediction errors before, during, and after image presentation. Prediction errors  
 23 elicited before image presentation would reflect the value information presented at trial outset (leftmost  
 24 peak; colors indicate value), prediction errors at image presentation would reflect reward probability  
 25 information conveyed by the image and its interaction with trial value (middle peak; solid/dashed lines  
 26 reflect high/low reward probabilities), and prediction errors occurring after image presentation would  
 27 convey information about trial outcome (rightmost peak; colors reflect trial outcome). **c**, After the learning  
 28 task, subjects completed a surprise recognition memory test in which each image was either “old” (i.e.,  
 29 from the learning task) or “new” (i.e., a novel lure). Subjects were asked to provide a binary answer along

1 with a 1-4 confidence rating for each image. Importantly, the new images were semantically matched to  
2 the old images such that accurate responding depended on the retrieval of detailed perceptual information  
3 from encoding. **d**, Reward probabilities during the learning task were determined by image category, were  
4 yoked across categories, and were reset occasionally to require learning (black dotted line). Binary  
5 outcomes indicating whether the gamble would be rewarded (red/black dots) were governed by reward  
6 probabilities and could be used by an ideal observer model to infer the underlying reward probabilities  
7 (blue). **e-g**, The ideal observer learned in proportion to the surprise associated with a given trial outcome  
8 (**e**) and the uncertainty about its estimate of the current reward probability (**f**), both of which fluctuated  
9 dynamically throughout the task and were dissociable from reward prediction error signals at time of  
10 feedback (**g**) and at time of image presentation (**h**).

11  
12 Analyses of data from 199 subjects suggest that they (1) integrated reward probability  
13 and value information and (2) utilized reward prediction errors, surprise, and uncertainty  
14 to gamble effectively. Subjects increased the proportion of play (gamble) responses as  
15 a function of both trial value and the ground truth category reward probability (Fig 2a).  
16 To capture trial-to-trial dynamics of subjective category probability assessments, we fit  
17 play/pass data from each subject with a set of reinforcement learning models. The  
18 simplest such model fit betting behavior as a weighted function of reward magnitude  
19 and probability, with probabilities updated on each trial with a fixed learning rate. More  
20 complex models (see Methods for details) considered the possibility that this learning  
21 rate might itself be adjusted according to other factors such as surprise, uncertainty, or  
22 whether the subject had decided to gamble on the trial. Consistent with previous work  
23 <sup>30,31,47,48</sup>, the best fitting model adjusted learning according to normative measures of  
24 both surprise and uncertainty (Fig 2c). Coefficients describing the effects of surprise and  
25 uncertainty on learning tended to be positive across subjects, indicating that subjects  
26 were more responsive to feedback if it was surprising or was provided during a period of  
27 uncertainty (Fig 2d; surprise:  $t = 2.69$ ,  $df = 198$ ,  $p = 0.0078$ ; uncertainty  $t = 6.38$ ,  $df =$   
28  $198$ ,  $p < 0.001$ ). Thus, subject behavior in the learning task is best described as using  
29 surprise and uncertainty to scale the extent to which reward prediction errors are used  
30 to adjust subsequent behavior.

31

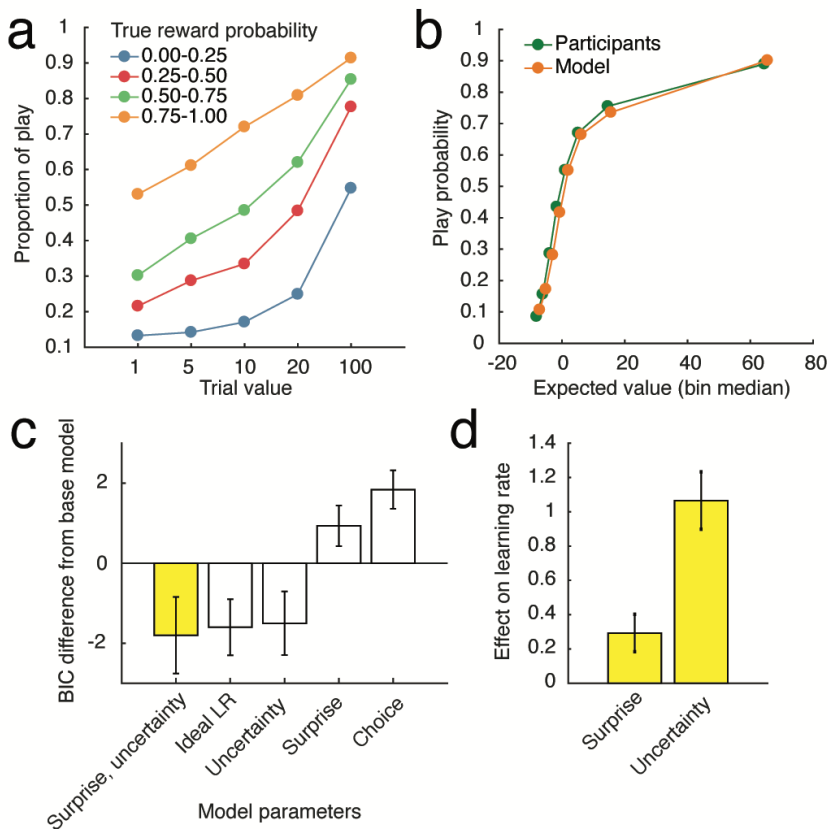

1  
2 **Figure 2:** Subjects' gambling behavior integrated reward value and subjective reward probability  
3 estimates, which were updated as a function of surprise and uncertainty. **a**, Proportion of trials in which  
4 the subjects chose to play, broken down by reward value and true reward probability. **b**, Subject choice  
5 behavior and model-predicted choice behavior. The model with the lowest BIC, which incorporated the  
6 effects of surprise and uncertainty on learning rate, was used to generate model behavior. Expected  
7 values for all trials were divided into 8 equally sized bins for both subject and model-predicted behavior. **c**,  
8 Bayesian information criterion of five reinforcement learning models with different parameters that affect  
9 learning rate. **d**, Mean maximum likelihood estimates of surprise and uncertainty parameters of the best  
10 fitting model (first bar on **c**). Error bars indicate standard error across subjects.

11  
12  
13 Behavior in the recognition task confirmed that subjects formed memories about the  
14 unique images displayed in the learning task. Subjects completed a surprise recognition  
15 memory task either five minutes (no delay,  $n = 109$ ) or twenty-four hours (24 hour delay,  
16  $n = 90$ ) after completion of the learning task. During the recognition memory task,  
17 subjects viewed all the "old" images from the learning task plus a semantically matched  
18 set of "new" foil images that were not shown previously. For each image, subjects  
19 provided a binary response indicating whether the image was old or new, along with a  
20 1-4 confidence measure.

21  
22 Subjects in both delay conditions reliably identified images that had been presented in  
23 the learning task with accuracy above chance (Fig 3a; mean(sem)  $d' = 0.85(0.042)$  for  
24 no delay and  $0.50(0.030)$  for 24 hour delay condition). The reliability of memory reports



1 was greater when subjects expressed higher levels of confidence (mean(sem)  $d' =$   
2 1.12(0.062) for no delay and 0.65(0.039) for 24 hour delay condition) than when they  
3 reported lower confidence (mean(sem)  $d' = 0.44(0.038)$  for no delay and 0.25(0.037) for  
4 24 hour delay condition).

5  
6 To aggregate information provided in the binary reports and confidence measure we  
7 transformed these sources of data to create a single 1-8 memory score, such that 8  
8 reflected a high confidence “old” response and 1 reflected a high confidence “new”  
9 response. As expected, the true proportion of “old” images was higher when memory  
10 scores were highest, and the relationship between memory scores and ground truth was  
11 monotonic and roughly linear across both delay conditions (Fig 3b). Thus, subjects  
12 incidentally formed lasting memories for the images displayed in the learning task, and  
13 memory scores provided a measure of the subjective memory strength associated with  
14 each image.

15  
16 Recognition memory for an image depended on the context in which that image was  
17 presented during the learning task. Memory scores for previously viewed images were  
18 higher for images observed on trials in which subjects gambled (play) than for images  
19 observed on trials in which they passed (Fig 3c; FigS1). The difference between  
20 memory scores for old and new items was larger for play than pass trials ( $t=3.30$ ,  
21  $dof=198$ ,  $p = 0.001$ ) and this did not differ across delay conditions ( $t=0.38$ ,  $dof=198$ ,  $p =$   
22  $0.70$ ) (Fig 3d). Larger memory scores were produced, at least in part, by an increase in  
23 the sensitivity of memory reports. Across all possible memory scores, hit rate was  
24 higher for play trials than for pass trials and the area under subject-specific ROC curves  
25 generated in this way was greater for play as compared to pass trials (Fig 3e;  $t=3.12$ ,  
26  $dof=198$ ,  $p = 0.002$ ) but did not differ across delay conditions ( $t=0.34$ ,  $dof=197$ ,  $p=.73$ ).  
27 In principle, this enhanced memory encoding could be driven by positive reward  
28 prediction errors, which would occur in response to high probability images (figure 1b)  
29 and motivate play decisions (figure 2a). In subsequent analyses we test this idea  
30 directly.

31  
32

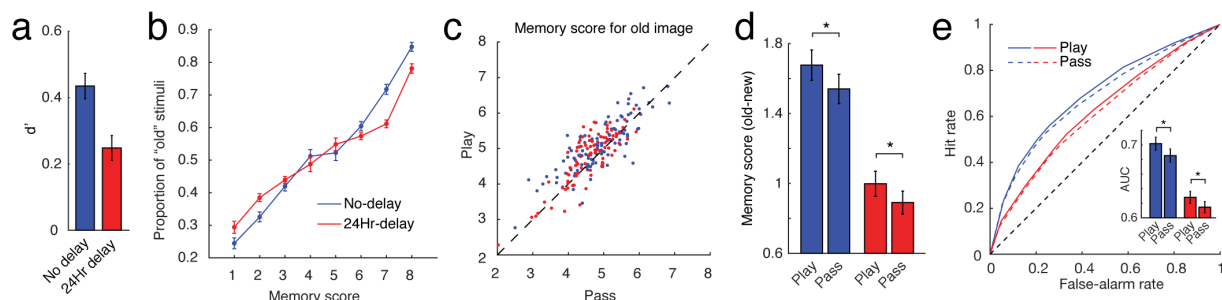

33  
34 **Figure 3:** Recognition memory is stronger for stimuli presented on trials in which subjects accepted the  
35 gamble. **a**, Average  $d'$  for the two delay conditions. **b**, Average proportion of image stimuli that were “old”  
36 (presented during the learning task), separated by memory score. **c**, Mean memory score of “old” images  
37 for play trials versus pass trials. Each point represents a unique subject. A majority of subjects lie above  
38 the diagonal, indicating better memory performance for play trials. **d**, Mean pairwise difference in memory

1 score between the “old” images and their semantically-matched foil images. **e**, ROC curves for play vs.  
2 pass trials. Area under the ROC curves (AUC) shown in the inset. AUC was greater for play versus pass  
3 trials, indicating better detection of old versus new images for play trials compared to pass trials. Colors  
4 indicate time between encoding and memory testing; blue = no delay, red = 24 hour delay.

5  
6

7 The degree to which memory was enhanced on play trials depended on the magnitude  
8 of the reward prediction error at time of image presentation (see Fig 1a,b). In particular,  
9 memory scores for play trials increased as a function of the reward prediction error  
10 computed at the time of image presentation (Fig 4a,b;  $t = 4.29$ ,  $df = 198$ ,  $p = 3 \times 10^{-5}$ ) in  
11 a manner that did not depend on delay condition ( $t = 0.09$ ,  $df = 198$ ,  $p = 0.93$ ).  
12 Moreover, this effect was most prominent in the subjects that displayed gambling  
13 behaviors that were the most sensitive to trial-to-trial fluctuations in probability and value  
14 (spearman correlation of gambling GLM coefficients (probability & value) with memory  
15 score image RPE coefficient:  $\rho = 0.14$ ,  $p = 0.04$ ).

16

17 To better understand the nature of this relationship, we show subsequent memory  
18 scores related to the constituent components of the reward prediction error signal. A key  
19 feature of an error in reward prediction at the time of image presentation is that it should  
20 depend directly on reward probability (i.e., the probability associated with the image  
21 category relative to the average reward probability across categories) as this is the  
22 reward information cued by the image. In contrast, the trial value should not directly  
23 influence RPE because this value was already indicated prior to image presentation,  
24 and should thus only inform reward predictions themselves, and not their errors.  
25 Consistent with a selective effect of RPE at time of image presentation, subsequent  
26 memories were stronger for play trials in which the image category was associated with  
27 a higher reward probability (Fig 4c,d;  $t = 3.31$ ,  $df = 198$ ,  $p = 0.001$ ) but not for play trials  
28 with higher potential outcome value, which if anything were associated with slightly  
29 lower memory scores (Fig 4e,f;  $t = -1.97$ ,  $df = 198$ ,  $p = 0.051$ ). Reward probability  
30 effects were stronger in subjects that displayed more sensitivity to probability and value  
31 in the gambling task (spearman correlation of gambling GLM coefficients (probability &  
32 value) with memory score image reward probability coefficient:  $\rho = 0.16$ ,  $p = 0.02$ ).

33

34

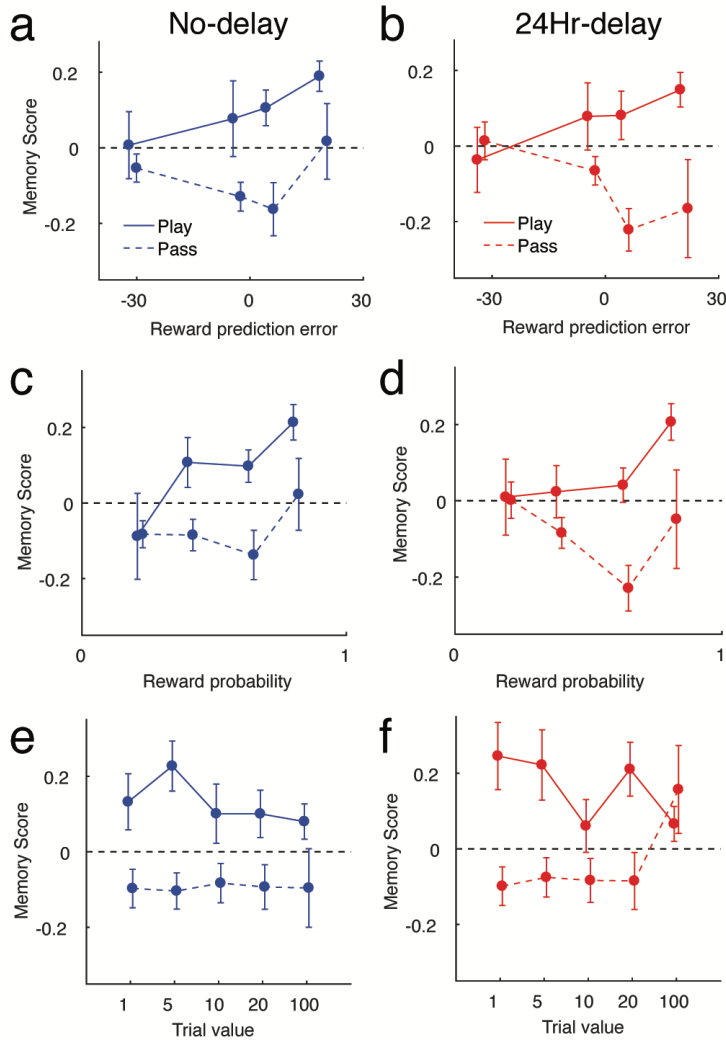

**Figure 4:** Subsequent memory strength depends on the reward prediction error at time of image presentation, but not trial value. **a,b**, Reward prediction error during image presentation shows a positive association with subsequent recognition memory for the image in both no delay (**a**; blue) and 24 hour delay (**b**; red) conditions. **c-f**, Reward probability estimates (**c,d**), but not reward value (**e,f**) retained the positive association with subsequent memory. This suggests that prediction error that occurs during image presentation, but not the overall value of the image, is driving the subsequent memory effect. Colors indicate time between encoding and memory testing; blue = no delay, red = 24 hour delay.

While subject gambling behavior depended critically on the reward prediction error, uncertainty, and surprise associated with trial feedback, to our surprise none of these factors influenced subsequent memory for the images. Specifically, memory scores were not systematically related to the reward prediction error experienced at time of feedback on the trial preceding image presentation (Fig 5a;  $t = 0.25$ ,  $dof = 198$ ,  $p = 0.80$ ) or immediately after image presentation (Fig 5b;  $t = -1.19$ ,  $dof = 198$ ,  $p = 0.26$ ). Similarly, the surprise associated with feedback preceding (Fig 5b;  $t = -1.71$ ,  $dof = 198$ ,  $p = 0.088$ ) or following (Fig 5d;  $t = 1.24$ ,  $dof = 198$ ,  $p = 0.16$ ) image presentation was not systematically related to subsequent memory scores. Furthermore, there were no

1 obvious relationships between subsequent memory score and uncertainty, again  
2 despite the apparent impact of uncertainty on subject gambling behavior (fig 5e,  
3 previous trial uncertainty,  $t=1.70$ ,  $dof=198$ ,  $p=0.091$ ; fig 5f, current trial uncertainty,  $t = -$   
4  $0.63$ ,  $dof = 198$ ,  $p = 0.53$ ).

5  
6

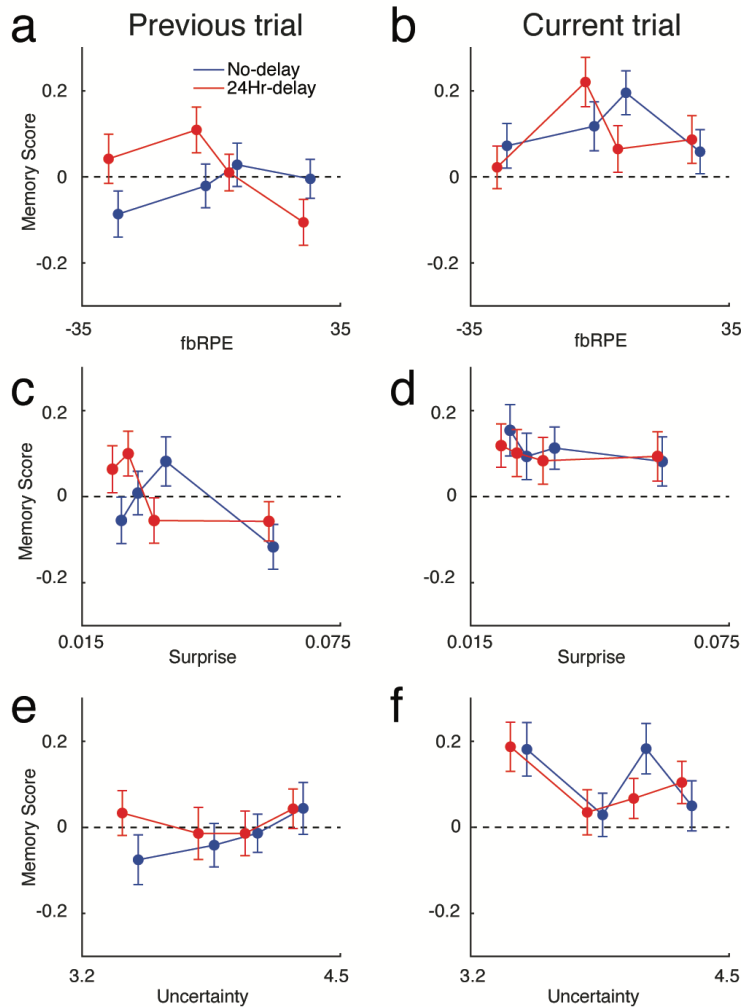

7  
8 **Figure 5:** Subsequent memory is not affected by unexpected rewards, surprise, or outcome uncertainty  
9 during the feedback preceding or following image presentation. **a,b**, Reward prediction error during the  
10 feedback phase of the previous trial (**a**) or current trial (**b**) did not affect subsequent memory. **c,d**,  
11 Surprise associated with the feedback phase of the previous (**c**) or current (**d**) trial did not affect  
12 subsequent memory. **e,f**, Uncertainty during the previous (**e**) or current (**f**) trial did not affect subsequent  
13 memory. Colors indicate time between encoding and memory testing; blue = no delay, red = 24 hour  
14 delay.

15  
16  
17  
18  
19  
20

1 To better estimate the contributions of learning-related computations to subsequent  
2 memory strength, we constructed a hierarchical regression model capable of 1) pooling  
3 information across subjects and delay conditions in an appropriate manner, 2)  
4 estimating the independent contributions of each factor while simultaneously accounting  
5 for all others, and 3) accounting for the differences in memory scores attributable to the  
6 images themselves. The hierarchical regression model attempted to predict memory  
7 scores by estimating coefficients at the level of items and subjects, as well as estimating  
8 the mean parameter value over subjects and the effect of delay condition for each  
9 parameter (Fig 6a).

10 Consistent with the results presented thus far, the hierarchical regression results  
11 support the notion that encoding was strengthened by the decision to gamble (play vs.  
12 pass) and reward prediction errors elicited at the time of image presentation, but not by  
13 the computational factors that controlled learning rate (surprise and uncertainty). Play  
14 trials were estimated to contribute positively to encoding, as indexed by uniformly  
15 positive values for the posterior density on the play/pass parameter (Fig 6b top row of  
16 column 2; table 1). The reward probability associated with the displayed category was  
17 positively related to subsequent memory on play trials (Fig 6b column 3; table 1), as  
18 was its interaction with value (Fig. 6b column 5; table 1)—although there was no reliable  
19 effect of value itself (Fig 6b columns 6; table 1). The direction of the interaction effect  
20 suggests that subjects were more sensitive to image probability on trials in which there  
21 were more points available to be won, consistent with the more nuanced predictions of a  
22 reward prediction error at time of image presentation (Fig 1b). All observed effects were  
23 selective for the old items that subjects observed in the task, as the same model fit to  
24 the new, foil images yielded coefficients near zero for each of these terms (Fig S2).  
25 Consistent with our previous analysis, coefficients for the uncertainty and surprise terms  
26 were estimated to be near zero (Fig 6b rightmost columns; table 1).

27 In addition to supporting our previous analyses, our model allowed us to examine  
28 the extent to which any subsequent memory effects required a consolidation period. In  
29 particular, any effects on subsequent memory that were stronger in the 24hr delay  
30 condition vs. the immediate condition might reflect an effect of post-encoding processes.  
31 Despite evidence from animal literature that dopamine can robustly affect memory  
32 consolidation (e.g., Bethus et al., 2010), we did not find strong support for any of our  
33 effects being consolidation dependent (note lack of positive coefficients in bottom row of  
34 Fig 6b, which would indicate effects stronger in the 24 hour condition). As might be  
35 expected, subjects in the no delay condition tended to have higher memory scores  
36 overall (Fig 6b bottom of column 1; table 1) but their memory scores also tended to  
37 change more as a function of reward probability (Fig 6b bottom of column 3; table 1)  
38 than did their counterparts in the 24hr delay condition. These results reveal the  
39 expected decay of memory over time, and suggest that the image prediction errors  
40 induced by categories associated with higher reward probability are associated with an  
41 immediate and decaying boost in memory accuracy.

42  
43 In summary, behavioral data and computational modeling support a role for  
44 computation of surprise, uncertainty and reward prediction error in the learning phase of

1 our paradigm. However, only decisions to gamble and the instantaneous reward  
 2 prediction error at the time of image presentation were related to subsequent memory.  
 3 To better understand the reward prediction error effect, and to ensure the reliability of  
 4 our findings, we conducted a second experiment.

A

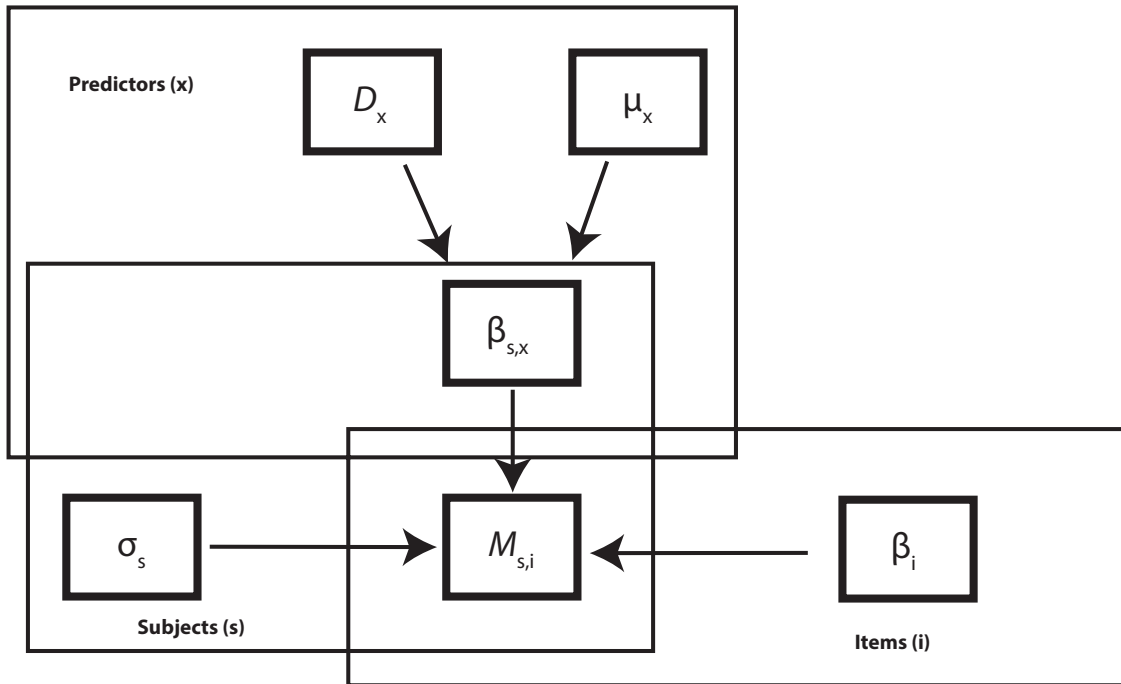

B

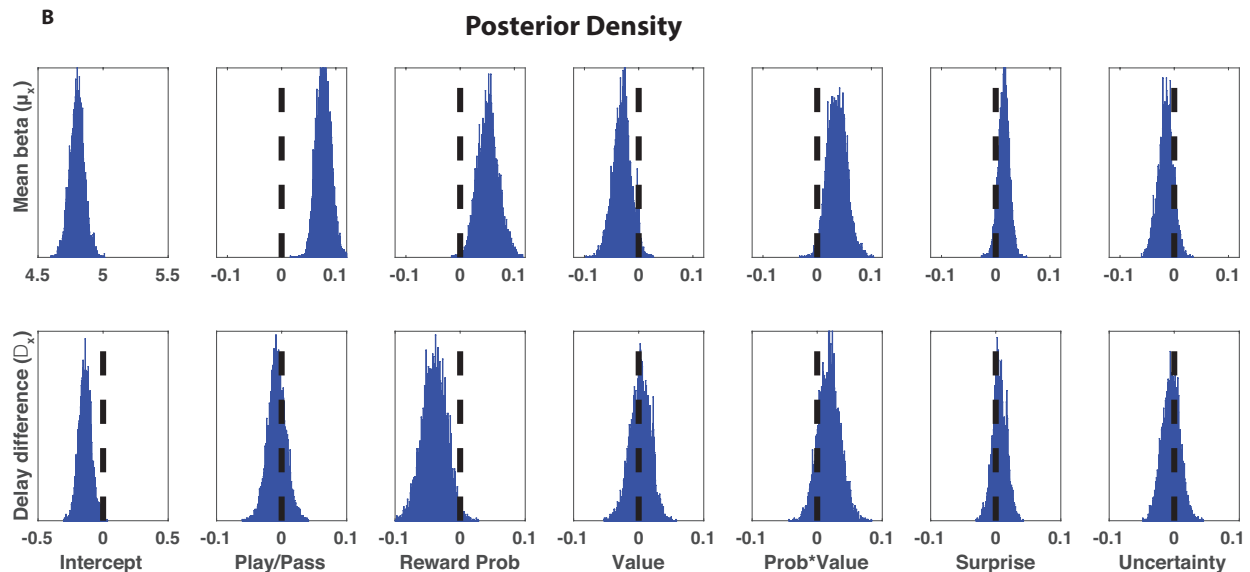

5  
 6 **Figure 6:** Hierarchical regression model reveals effects of choice and positive prediction errors on  
 7 recognition memory encoding. **a:** Graphical depiction of hierarchical regression model. Memory scores for  
 8 each subject and item ( $M_{s,i}$ ) were modeled as normally distributed with subject specific variance ( $\sigma_s$ ) and a  
 9 mean that depended on the sum of two factors: 1) subject level predictors related to the decision context

1 in which an image was encountered (i.e., whether the subject played or passed) linearly weighted  
2 according to coefficients ( $\beta_{s,x}$ ) and 2) item level predictors specifying which image was shown on each  
3 trial and weighted according to their overall memorability across subjects ( $\beta_i$ ). Coefficients for subject level  
4 predictors were assumed to be drawn from a global mean value for each coefficient ( $\mu_x$ ) plus an offset  
5 related to the delay condition ( $D_x$ ). Parameters were weakly constrained with priors that favored mean  
6 coefficient values near zero and low variance across subject and item specific coefficients. **b**: Posterior  
7 probability densities for mean predictor coefficients ( $\mu_x$ ; top row) and delay condition parameter difference  
8 ( $D_x$ ; bottom row) estimated through MCMC sampling over the graphical model informed by the observable  
9 data ( $M_{s,i}$ ).

## 12 Experiment 2

14 Our previous findings suggested that variability in the strength of memory encoding was  
15 related to computationally-derived RPE signals and the gambling behavior that elicited  
16 them. However, the yoked reward probabilities in Experiment 1 ensured that the reward  
17 probability associated with the image category presented would be perfectly anti-  
18 correlated with the reward probability associated with the other category that was not  
19 presented. Thus, while a high reward category item would increase the expected reward  
20 relative to before the trial and hence elicit an RPE, we were unable to disentangle  
21 whether the observed effects were driven by the reward probability directly, the  
22 counterfactual reward associated with the alternate category, or, as would be predicted  
23 by a true reward prediction error, their difference. To address this issue we conducted a  
24 second experiment in which expectations about reward probability were manipulated  
25 independently of the actual reward probability on each trial allowing us to distinguish  
26 between these alternative explanations.

28 Specifically, we modified the design of our task such that the learning phase included  
29 separate manipulations of reward probability for the two image categories. Thus, during  
30 some trials both categories would be associated with a high reward probability and in  
31 some sessions both would be associated with a low reward probability (Fig 7a-b). In this  
32 design, RPEs are relatively small when the reward probabilities are high for both  
33 categories and deviate much more substantially when the reward probability differs  
34 across image category (Fig 7c). Thus, if the factor boosting subsequent memory scores  
35 is truly a reward prediction error, it should depend positively on the reward probability  
36 associated with the image category, but negatively with the reward probability  
37 associated with the other category.

39 Subjects in both delay conditions reliably identified images presented in the learning  
40 task with accuracy above chance (Fig 7d; mean(sem)  $d' = 0.91(0.058)$  for no delay and  
41  $0.54(0.034)$  for 24 hour delay condition). We also observed a robust replication of the  
42 difference in memory scores for trials in which subjects either gambled or passed on the  
43 offer to gamble (Fig 7e;  $t=3.89$ ,  $dof=172$ ,  $p<0.001$ ; difference across delay condition,  $t=-$   
44  $0.60$ ,  $dof=171$ ,  $p=0.55$ ).

1 In the new experimental design, we could analyze variability in memory scores for each  
 2 old image as a function of its associated category reward probability (“image category”)  
 3 and the reward probability associated with the other category (“other category”). Based  
 4 on the RPE account, we hypothesized that we would see a positive effect of the  
 5 experienced reward (image category) and a negative effect of the reward that would  
 6 have otherwise been available (other category) on subsequent memory. Consistent with  
 7 this prediction, for both delay conditions, there was a cross-over effect whereby memory  
 8 scores scaled positively with the probability associated with the image category (Fig 7f,g  
 9  $t=2.37$ ,  $dof=172$ ,  $p=0.019$ ), and negatively with the probability associated with the other  
 10 category ( $t=-2.27$ ,  $dof=172$ ,  $p=0.024$ ). These effects did not differ across delay  
 11 conditions (current category,  $t=0.55$ ,  $dof=171$ ,  $p=0.58$ ; other category,  $t=0.36$ ,  $dof=171$ ,  
 12  $p=0.72$ ).  
 13  
 14

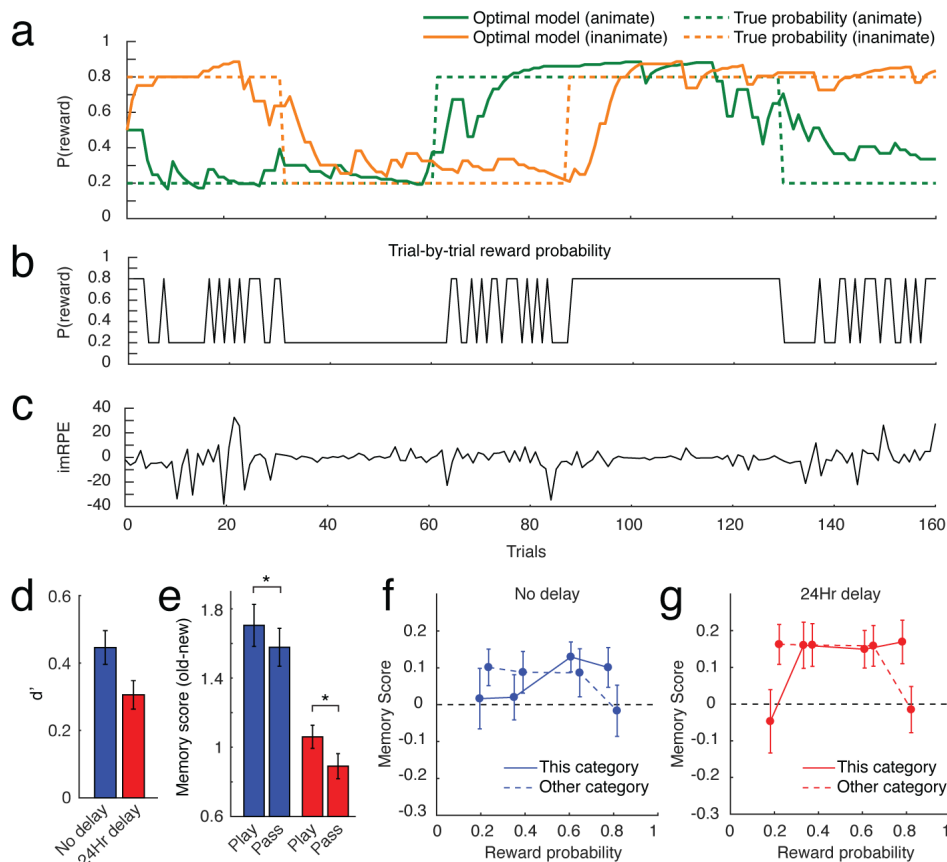

15  
 16 **Figure 7:** Experiment 2 allowed us to separately estimate the effects of both category probabilities on  
 17 subsequent memory recall. **a:** In the new learning task, the true reward probabilities of the two categories  
 18 were independent, and were restricted to either 0.2 or 0.8. The change-points occurred randomly,  
 19 ensuring that each subject completed a unique learning task. Restrictions were applied so that each task  
 20 contained at least one block (constituting at least 20 trials) of the four possible reward probability  
 21 combinations (0.2/0.2, 0.2/0.8, 0.8/0.2, 0.8/0.8). **b:** Trial-by-trial reward probability shows stretches of  
 22 stable reward probability (0.2/0.2, 0.8/0.8), or varying reward probability (0.2/0.8, 0.8/0.2). **c:** The  
 23 variability of imRPE is influenced by the reward probability conditions. **d:** Average  $d'$  for both delay  
 24 conditions. **e:** Mean pairwise difference in memory score between the “old” images and their semantically-



1 matched foil images. **f,g**: There is a positive association between reward probability of the currently  
2 shown stimulus category and subsequent recognition memory, and a negative association between the  
3 reward probability of the other stimulus category and memory. In panels d-f, colors indicate time between  
4 encoding and memory testing; blue = no-delay, red = 24 delay.

5  
6 To better estimate the effects of image category, other category, and play/pass behavior  
7 on subsequent memory we fit memory score data with a modified version of the  
8 hierarchical regression model that included separate reward probability terms for the  
9 “image” and “other” categories. Posterior density estimates for the play/pass coefficient  
10 were greater than zero (Fig 8a; table 1), replicating our previous finding. The posterior  
11 density for the “image category” and “other category” probabilities was concentrated in  
12 the region over which image category was greater than other category (mean [95% CI]  
13 image category coefficient – other category coefficient: 0.052 [0.015,0.94]) and  
14 supported independent and opposite contributions of both category probabilities (Fig 8b;  
15 table 1). These results, in particular the negative effect of “other category” probability on  
16 the subsequent memory scores, are more consistent with an effect of prediction error  
17 than a direct effect of reward prediction itself. More generally, these results support the  
18 hypothesis that reward prediction errors elicited at the time of image presentation  
19 enhance the degree to which such images are encoded in episodic memory systems.

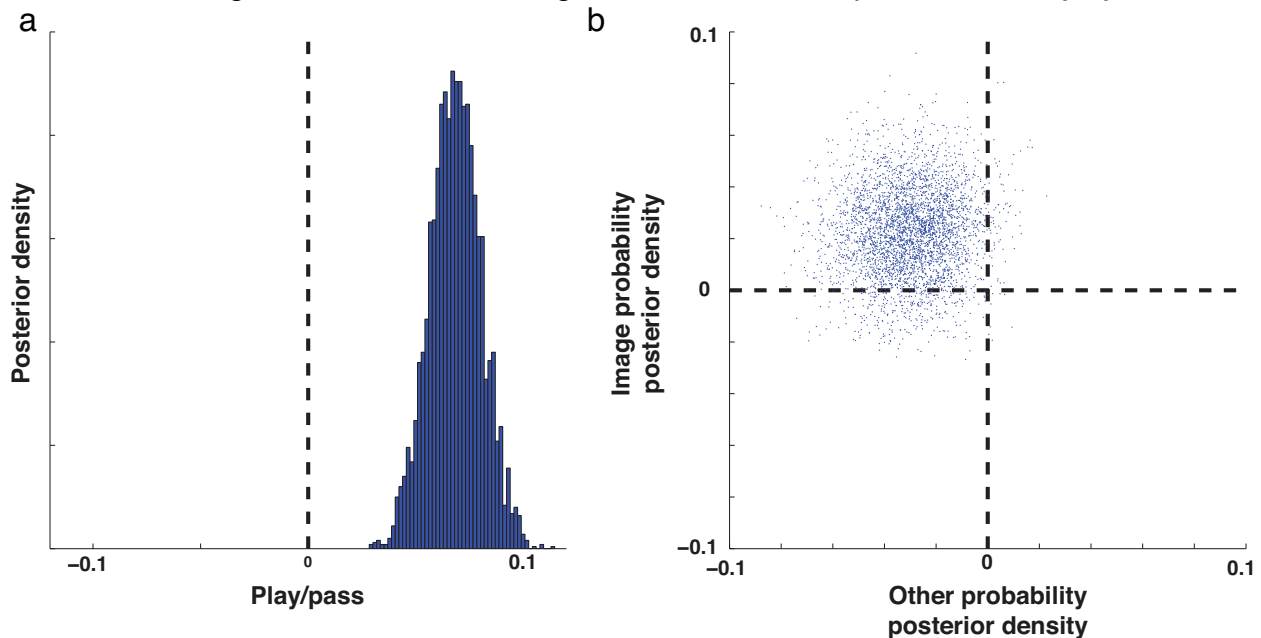

20  
21 **Figure 8:** Memory scores in experiment two depend on subject gambling behavior and the probabilities  
22 associated with both image categories. Memory score data from experiment two was fit with a version of  
23 the hierarchical regression model described in figure 6A to replicate previous findings and determine  
24 whether reward probability effects were attributable to both observed and unobserved category  
25 probabilities. **a:** Posterior probability estimates of the mean play/pass coefficient were greater than zero  
26 and consistent with those measured in the first experiment. **b:** Image category probability (observed)  
27 coefficients are plotted against other category probability (unobserved) coefficients revealing that subjects  
28 tended to have higher memory scores for images that were associated with high reward probabilities  
29 (upward shift of density relative to zero) and when the unobserved image category was associated with a  
30 low reward probability (leftward shift of density relative to zero).

31

1 Despite the general agreement between the two experiments, there was one noteworthy  
2 discrepancy. While hierarchical models fit to both datasets indicated higher probability of  
3 positive coefficients for the interaction between value and probability (e.g. positive  
4 effects of probability on subsequent memory are greater for high value trials), the 95%  
5 credible intervals for these estimates in experiment two included zero as a possible  
6 coefficient value (table 1) indicating that the initial finding was not replicated in the  
7 strictest sense.

8  
9 To better understand this discrepancy, and make the best use of the data from both  
10 experiments we extended the hierarchical regression approach to include additional  
11 coefficients capable explaining differences across the two experiments and fit this  
12 extended model to the combined data. As expected, this model provided evidence for a  
13 memory advantage on play trials, and an amplification of this advantage for trials with a  
14 high reward probability based on image category (Fig S4; table 1). Across the combined  
15 dataset there was also positive effect of the interaction between value and probability  
16 (Fig S4; table 1), supporting our initial observation in experiment one. Furthermore, we  
17 observed that the reward probability effect was greater in the no delay condition (Fig S4;  
18 table 1), with no evidence for any memory effects being stronger in the 24 hour delay  
19 condition (table 1; all other delay difference  $p > .19$ ).

## 21 22 **Discussion**

23  
24 An extensive prior literature has linked dopamine to reward prediction errors elicited  
25 during reinforcement learning<sup>5,6,19,39,49-51</sup>, and a much smaller literature has suggested  
26 that dopamine can also influence the encoding and consolidation of episodic memories  
27 by modulating activity in the medial temporal lobes<sup>18,40,52</sup>. To date, however, there has  
28 been mixed evidence regarding the relationship between prediction error signaling and  
29 memory encoding. Here we used a novel two-stage learning and memory paradigm  
30 along with computational modeling to better characterize how prediction error signals  
31 affect the strength of incidental memory formation.

32  
33 We found that memory encoding was stronger for trials in which the subjects observed  
34 an image that was associated with high reward probability (figure 5c,d). This effect was  
35 only evident for trials in which subjects accepted the risky offer (consistent with the fact  
36 that trial outcome was always zero on pass trials), was evident even after controlling for  
37 other potential confounds (figure 6b column 3), and was amplified for trials in which  
38 more points were on the line (figure 6b column 5). These results are all consistent with a  
39 direct effect of reward prediction error at time of image presentation on memory  
40 encoding (figure 5a,b). This interpretation is bolstered by evidence that individuals that  
41 were more sensitive to value and probability in the decision making task showed reward  
42 prediction error memory benefits to a greater degree. Experiment two further supported  
43 the reward prediction error interpretation by demonstrating that memory benefits were  
44 composed of equal and opposite contributions of the reward probability associated with

1 the observed image category and that of the unobserved, counterfactual, one (Figure  
2 7f,g, Figure 8b). Together, these results provide evidence for the hypothesis that reward  
3 prediction errors enhance the encoding of simultaneously presented incidental visual  
4 information for subsequent memory.

5  
6 We also found that subjects encoded memoranda to a greater degree on trials in which  
7 they selected a risky bet (figure 3). This finding is consistent with a positive relationship  
8 between prediction error signaling and memory strength, in that subject behavior  
9 provides a proxy for the subjective reward probability estimates (figure 2A). However,  
10 this behavioral effect was prominent in both experiments, even after controlling for  
11 model-based estimates of reward prediction error (figures 6b & 8a). Therefore, while we  
12 suspect that this result may at least partially reflect the direct impact of reward prediction  
13 error, it may also reflect other factors associated with risky decisions. On play trials,  
14 subjects view items while anticipating the uncertain gain or loss of points during the  
15 upcoming feedback presentation whereas on pass trials, subjects are assured to  
16 maintain their current score. The possibility that this difference in risk might contribute to  
17 the subsequent memory effects observed for choice behavior would be consistent with  
18 recent work showing that memoranda presented immediately prior to feedback are  
19 better remembered if they preceded more uncertain feedback<sup>53</sup>. One potential  
20 confound for these choice effects is the heightened state of attention that might occur  
21 before receiving a more informative task outcome. While we are unable to rule this  
22 possibility out completely, our study minimizes this possibility by presenting  
23 counterfactual information on pass trials that is nearly identical to the experienced  
24 outcome information. We find that subjects are slightly more influenced by outcome  
25 information provided on play trials, suggesting that anticipatory attention might differ  
26 somewhat between the two conditions (Fig S3a); however the degree of this difference  
27 was small enough that model selection favored a model that did not distinguish between  
28 play and pass trials for learning (Fig 2c). Furthermore, there was no relationship  
29 between the degree to which subjects modulated learning from feedback on play versus  
30 pass trials and the degree to which they showed subsequent memory improvements on  
31 play trials (Fig S3b). Given that risky decisions tend to be preceded by higher levels of  
32 dopamine, the possibility of a direct effect of risk taking on subsequent memory would  
33 still be consistent with a dopaminergic mechanism<sup>22-24,27</sup>.

34  
35 This relationship between reward prediction errors and memory is consistent with a  
36 broad literature highlighting the effects of dopaminergic signaling on hippocampal  
37 plasticity<sup>32,35,36</sup> and memory formation<sup>40</sup> as well as an equally broad literature  
38 suggesting that dopamine provides a reward prediction error signal<sup>5,19</sup> through  
39 projections that extend both to the striatum and the hippocampus<sup>17</sup>. Our results support  
40 the behavioral consequences that might be predicted to result from such mechanisms,  
41 however they also refine them substantially. In particular, we show that the timing of  
42 reward prediction error signaling relative to the memorandum is key; we saw no effect of  
43 the reward prediction error elicited by prior or subsequent feedback on memory strength  
44 (Figure 4a&b), despite strong evidence that this feedback was used to guide

1 reinforcement learning and decision making (Figure 2). Furthermore, we showed that  
2 prediction error effects on memory emerged immediately after task performance and  
3 were not enhanced after 24 hours (Figure 5a&b; Figure 6b column 3). These results are  
4 somewhat at odds with previous literature suggesting that dopamine dependent memory  
5 enhancement emerges only after an extended consolidation period<sup>40</sup>. It is unclear to  
6 what extent we should expect generalization of these results to our study, given the  
7 differences in experimental paradigm, timescale, memory demands, and species in the  
8 two paradigms. However, our results open the door for future research to (1) directly  
9 test whether prediction error driven memory enhancements are mediated by changes in  
10 dopamine, and (2) characterize the conditions under which dopamine mediated  
11 changes to memory encoding do and do not require a consolidation period.  
12

13 More generally, our results provide insight into the apparent inconsistency in previous  
14 behavioral studies that have attempted to link reward prediction error signals to memory  
15 encoding. Consistent with previous work (e.g.<sup>54</sup>), our results emphasize the importance  
16 of choice in the degree to which image valence contributed to memorability. Indeed, for  
17 trials in which the subjects passively observed outcomes, we saw no relationship  
18 between model derived reward prediction error estimates and subsequent memory  
19 strength (Figure 5a&b dotted lines). This might help to explain the lack of a signed  
20 relationship between reward prediction errors and subsequent memory strength in a  
21 recent study by Rouhani and colleagues that leveraged a Pavlovian design that did not  
22 require explicit choices to be made<sup>44</sup>. In contrast to our results, Rouhani and colleagues  
23 observed a positive effect of absolute prediction error, similar to our model-based  
24 surprise estimates, on subsequent memory. While we saw no effect of surprise on  
25 subsequent memory, other work has highlighted a role for such signals as enhancing  
26 hippocampal activation and memory encoding<sup>55,56</sup>. One potential explanation for this  
27 discrepancy is in the timing of image presentation. Our study presented images only  
28 briefly during the choice phase of the decision task. By contrast, Rouhani and  
29 colleagues presented the memoranda for an extended period that also encompassed  
30 the epoch containing trial feedback, potentially explaining why they observed effects  
31 related to outcome surprise. More generally, the temporally selective effects of reward  
32 prediction error observed here suggest that the reward prediction error effects may differ  
33 considerably from other, longer timescale manipulations thought to enhance memory  
34 consolidation through dopaminergic mechanisms<sup>18,33,41,42</sup>.

35  
36 Our results appear somewhat incompatible on first glance with those of Wimmer and  
37 colleagues<sup>43</sup>, who show that stronger prediction error encoding in the ventral striatum is  
38 associated with weaker encoding of incidental information. We suspect that the  
39 discrepancy between these results is driven by differences in the degree to which  
40 memoranda are task relevant in the two paradigms. In our task, subjects were required  
41 to encode the memoranda sufficiently to categorize them in order to perform the primary  
42 decision-making task, whereas in the Wimmer study, memoranda were unrelated to the  
43 decision task and thus might not be well-attended on all trials. Taken together, these  
44 results suggest that reward prediction errors are most likely to enhance memory when

1 they are elicited by the memoranda themselves, with the potential influence of  
2 secondary tasks eliminated or at least tightly controlled.

3  
4 In summary, our results demonstrate a role for reward prediction errors in prioritizing  
5 information for memory storage. We show that this role is temporally and  
6 computationally precise, independent of consolidation duration (at least in the current  
7 paradigm), and contingent on decision-making behavior. These data should help clarify  
8 inconsistencies in the literature regarding the relationship between reward learning and  
9 memory, and they make detailed predictions for future studies exploring the relationship  
10 between dopamine signaling and memory formation.

## 11 12 13 14 **Methods**

### 15 16 Experiment 1

#### 17 18 **Experimental procedure**

19  
20 The task consisted of two parts: the learning task and memory task. The learning task  
21 was a reinforcement learning task with random change-points in reward contingencies  
22 of the targets. The memory task was a surprise recognition memory task using image  
23 stimuli that were presented during the learning task and foils.

24 Subjects completed either the no delay or 24-hour delay versions of the task. In  
25 the no delay condition, the memory task followed the learning task only after a short  
26 break, during which a demographic survey was given. Therefore, the entire task was  
27 performed in one sitting. In the 24-hour delay condition, subjects returned 20-30 hours  
28 after completing the learning task to do the memory task.

#### 29 30 **Subjects**

31 A total of 287 subjects (142, no delay condition; 145, 24hr-delay condition) completed  
32 the task via Amazon Mechanical Turk. From this, 88 subjects (33, no delay; 55, 24hr-  
33 delay) were excluded from analysis because they previously completed a prior version  
34 of the task or didn't meet our criteria of above-chance performance in the learning task.  
35 To determine whether a subject's performance was above-chance, we simulated  
36 random choices using the same task structure, then computed the total score achieved  
37 by the random performance. We then repeated such simulations 5000 times, and  
38 assessed whether the subject's score was greater than 5% of the score distribution from  
39 the simulations. The final sample had a total of 199 subjects (109, no delay, 90, 24hr-  
40 delay; 101 males, 98 females) with the age of  $32.2 \pm 8.5$  (mean  $\pm$  SD). Informed  
41 consent was obtained in a manner approved by the Brown University Institutional  
42 Review Board.

#### 43 44 **Learning task**

1 The learning task consisted of 160 trials, where each trial consisted of three phases –  
2 value, image, and feedback (Figure 1a). During the value phase, the amount of reward  
3 associated with the current trial was presented in the middle of the screen for 1.5 s. This  
4 value was equally sampled from [1, 5, 10, 20, 100]. After an interstimulus interval (ISI) of  
5 0.5 s, an image appeared in the middle of the screen for 3 s (image phase). During the  
6 image phase, the subject made one of two possible responses using the keyboard:  
7 PLAY (press 1) or PASS (press 0). When a response is made, a colored box indicating  
8 the subject's choice (e.g. black = play, white = pass) appeared around the image. The  
9 pairing of box color and subject choice was pseudorandomized across subjects. After  
10 this image phase, an ISI of 0.5 s followed, after which the trial's feedback was shown  
11 (feedback phase).

12 Each trial had an assigned reward probability, such that if the subject chose  
13 PLAY, they would be rewarded according to that probability. If the subject chose PLAY  
14 and the trial was rewarding, they were rewarded by the amount shown during the value  
15 phase (Figure 1a). If the subject chose PLAY but the trial was not rewarding, they lost  
16 10 points regardless of the value of the trial. If the choice was PASS, the subject neither  
17 earned nor lost points (+0), and was shown the hypothetical result of choosing PLAY  
18 (Figure 1a). During the feedback phase, the reward feedback (+value, -10, or  
19 hypothetical result) was shown for 1.5s, followed by an ISI (0.5 s), and a 1 s  
20 presentation of the subject's total accumulated score.

21 All image stimuli belonged to one of two categories: animate (e.g. whale, camel)  
22 and inanimate (e.g. desk, shoe). Each image belonged to a unique exemplar, such that  
23 there were no two images of the same animal or object. Images of the two categories  
24 had reward probabilities that were oppositely yoked. For example, if the living category  
25 has a reward probability of 90%, the non-living category had a reward probability of  
26 10%. Therefore, the subjects only had to learn the probability for one category, and  
27 simply assume the opposite probability for the other category.

28 The reward probability for a given image category remained stable until a  
29 change-point occurred, after which it changed to a random value between 0 and 1  
30 (Figure 1d). Change-points occurred with a probability 0.16 on each trial. To facilitate  
31 learning, change-points did not occur in the first 20 trials of the task and the first 15 trials  
32 following a change-point. Each subject completed a unique task with pseudorandomized  
33 order of images that followed these constraints.

34 The objective was to maximize the total number of points earned. Subjects were  
35 advised to pay close attention to the value, probability, and category of each trial in  
36 order to decide whether it is better to PLAY or PASS. Subjects were thoroughly  
37 informed about the possibility of change-points, and that the two categories were  
38 oppositely yoked. They underwent a practice learning task in which the reward  
39 probabilities for the two categories were 1 and 0 to clearly demonstrate these features  
40 of the task. Subjects were awarded a bonus compensation proportional to the total  
41 points earned during the learning and memory tasks.

42

43 **Memory task**

1 During the memory task, subjects viewed 160 "old" images from the learning task  
2 intermixed with 160 "new" images (Figure 1c). Images were selected such that there  
3 was a new image for each unique exemplar from the learning task. This was to ensure  
4 that subjects had to make judgments about the actual image itself, rather than the fact  
5 that they saw a particular exemplar (e.g. "I remember seeing THIS desk" vs. "I  
6 remember seeing A desk").

7 The order of old and new images was pseudorandomized. On each trial, a single  
8 image was presented, and the subject selected between OLD and NEW by pressing 1  
9 or 0 on the keyboard, respectively (Figure 1c). Afterwards, they were asked to rate their  
10 confidence in the choice from 1 (Guess) to 4 (Completely certain). Subjects were not  
11 provided with correct/incorrect feedback on their choices.

12  
13

### 14 **Bayesian optimal learning model**

15 The optimal learning model computed inferences over the probability of a binary  
16 outcome that evolves according to a change-point process. The model was given  
17 information about the true probability of a change-point occurring on each trial ( $H$ ;  
18 hazard rate) by dividing the number of change-points by the total number of trials for  
19 each subject. For each trial, a change-point was sampled according to a Bernoulli  
20 distribution using the true hazard rate ( $CP \sim B(H)$ ). If a change-point did not occur ( $CP =$   
21  $0$ ), the predicted reward rate ( $\mu_t$ ) was updated from the previous trial ( $\mu_{t-1}$ ). When a  
22 change-point did occur ( $CP = 1$ ),  $\mu_t$  was sampled from a uniform distribution between 0  
23 and 1. The posterior probability of each trial's reward rate given the previous outcomes  
24 can be formulated as follows:

25

$$p(\mu_t | X_{1:t}) \propto p(X_t | \mu_t) \sum_{CP_t} \sum_{\mu_{t-1}} p(\mu_t | CP_t, \mu_{t-1}) p(CP_t) p(\mu_{t-1} | X_{1:t-1}) p(X_{1:t-1}) \quad (1)$$

26 Where  $p(X_t | \mu_t)$  is the likelihood of the outcomes given the predicted reward rate,  
27  $p(\mu_t | CP_t, \mu_{t-1})$  represents the process of accounting for a possible change-point (when  
28  $CP = 1$ ,  $\mu_t \sim U(0,1)$ ),  $p(CP_t)$  is the hazard rate, and  $p(\mu_{t-1} | X_{1:t-1})$  is the prior belief of the  
29 reward rate.

30 Using the model-derived reward rate, we quantified the extent to which each new  
31 outcome influenced the subsequent prediction as the learning rate in a delta-rule:

32

$$\begin{aligned} B_{t+1} &= B_t + \alpha_t \delta_t \\ \delta_t &= X_t - B_t \end{aligned} \quad (2)$$

33

34 where  $B$  is the belief about the current reward rate,  $\alpha$  is the learning rate, and  $\delta$  is the  
35 prediction error, defined as the difference between the observed ( $X$ ) and predicted ( $B$ )  
36 outcome. Rearranging, we were able to compute the trial by trial learning rate:

37

$$\alpha = \frac{B_{t+1} - B_t}{X_t - B_t} \quad (3)$$

1 Trial by trial modulation of change-point probability (i.e. surprise) was calculated by  
2 marginalizing over  $\mu_t$ :

$$3 \quad p(\text{CP}_t | X_{1:t}) \propto p(X_t | \mu_t) \sum_{\mu_t} \sum_{\mu_{t-1}} p(\mu_t | \text{CP}_t, \mu_{t-1}) p(\text{CP}_t) p(\mu_{t-1} | X_{1:t}) p(X_{1:t-1}) \quad (4)$$

4  
5 Uncertainty was determined by calculating the entropy of a discrete random variable  $X$   
6 (i.e. reward rate) with possible values  $\{x_1, x_2, \dots, x_i\}$  for a finite sample (Shannon, 2001):

$$7 \quad H(X) = - \sum_i P(x_i) \ln(p(x_i)) \quad (5)$$

8  
9

10

11

12

### 13 **Descriptive analysis**

14

15 Memory scores for each image were computed by transforming the recognition and  
16 confidence reports provided by the subject. On each trial of the recognition memory  
17 task, subjects first chose between “old” and “new”, then reported their confidence in that  
18 choice on a scale of 1-4. We converted these responses so that choosing “old” with the  
19 highest confidence (4) was a score of 8, while choosing “new” with the highest  
20 confidence was a score of 1. Similarly, choosing “old” with the lowest confidence (1)  
21 was a score of 5, while choosing “new” with the lowest confidence was a score of 4. As  
22 such, memory scores reflected a confidence-weighted measure of memory strength  
23 ranging from 1 to 8. These memory scores were used for all analyses involving  
24 recognition memory.

25

26 Statistical analyses were performed in a between-subject manner. For each subject, we  
27 computed the mean memory score of each trial type in question, then subtracted the  
28 overall average memory score of the subject. Therefore, the memory scores used in our  
29 analyses reflect the degree to which a certain trial condition led to better or worse  
30 subsequent memory compared to average performance within each subject.

31

32 Relationships between computational factors and memory scores were assessed by  
33 estimating the slope of the relationship between each computational factor and the  
34 subsequent memory score separately for each computational variable and subject.

35 Statistical testing was performed using one sample t-tests on the regression coefficients



1 across subjects (for overall effects) and two sample t-tests for differences between  
2 delay conditions (for delay effects). Regression coefficients (slopes) for individual  
3 subjects were related to individual differences in decision making task performance  
4 (coefficients from a GLM describing subject choices (play/pass) in terms of reward  
5 probability and trial value) using spearman rank order correlation.

6  
7 To generate the descriptive figures, we performed a binning procedure for each subject  
8 to ensure that each point on the x axis contained an equal number of elements. For  
9 each subject, we divided the y variable in question into quartiles and used the mean y  
10 value of each quartile as the binned value. To plot data from all subjects on the same x  
11 axis, we first determined the median x value for each bin per subject, then took the  
12 average of the four bin median values across subjects. For figures containing more than  
13 one plot, we shifted the x values of each plot slightly off-center to avoid overlap of  
14 points.

15  
16 A set of reinforcement learning models were fit directly to the subject behavior using a  
17 constrained search algorithm (fmincon in Matlab) that maximized the total log posterior  
18 probability of betting behavior given the optimal reward probability estimates, trial  
19 values, and prediction errors (Fig c&d). All models contained four fixed parameters that  
20 affected choice behavior: 1) a temperature parameter of the softmax function used to  
21 convert trial expected values into action probabilities, 2) a value exponent term that  
22 scales the relative importance of the trial value in making choices, 3) a play bias term to  
23 indicate a tendency to attribute higher value to gambling behavior, and 4) an intercept  
24 term for the effect of learning rate on choice behavior. The value estimated from  
25 gambling on a given trial was given by:

$$26 \quad V(t) = playBias + (P_{rew} * trialValue^{valExp} + (1 - P_{rew}) * (-10)^{valExp})$$

27  
28 Where playBias is the play bias term, valExp is the value exponent, and  $P_{rew}$  is the  
29 reward probability inferred from the optimal model. The model fit with the above fixed  
30 parameters (the base model) was then compared to models that contained additional  
31 parameters that may affect trial-to-trial modulation of learning rate, including surprise,  
32 uncertainty, learning rate computed from the optimal Bayesian model, and subject  
33 choice behavior (play versus pass). In particular, learning rates were controlled through  
34 a logistic function of a weighted predictor matrix that included an intercept term as well  
35 as additional terms to capture the degree to which learning changed according to other  
36 factors. Maximum likelihood weights for each predictor in the matrix (as listed above)  
37 were estimated using gradient decent (fmincon in matlab) simultaneous with estimating  
38 the decision related parameters described above. The best fitting model was  
39 determined by computing the Bayesian information criterion (BIC) for each model, then  
40 comparing these values to that of the base model<sup>57</sup>. Weak priors favoring normative  
41 learning parameters were used to regularize parameter estimates for parameter  
42 estimation but not model selection.

43

1 To compare subject behavior to model-predicted behavior, we simulated choice  
2 behavior using the model with the lowest BIC, which incorporated surprise and  
3 uncertainty variables in determining learning rate (Fig 2b). On each trial, we used the  
4 expected trial value ( $V(t)$ ) computed above, and the parameter estimates of the  
5 temperature variable as inputs to a softmax function to generate choices.

## 9 **Hierarchical regression model**

11 Subject memory scores were modeled using a hierarchical mixture model that assumed  
12 that the memory score reported for each item and subject would reflect a linear  
13 combination of subject level predictors and item level memorability (Figure 6A). The  
14 hierarchical model was specified in STAN (<http://mc-stan.org>) using the matlabSTAN  
15 interface (<http://mc-stan.org>)<sup>58</sup>. In short, memory scores on each trial were assumed to  
16 be normally distributed with a variance that was fixed across all trials for a given subject.  
17 The mean of the memory score distribution on a given trial depended on 1) a trial-to-trial  
18 task predictors that were weighted according to coefficients estimated at the subject  
19 level and 2) item-to-item predictors that were weighted by coefficients estimated across  
20 all subjects. Subject coefficients for each trial-to-trial task predictor were assumed to be  
21 drawn from a group distribution with a mean and variance offset by a delay variable,  
22 which allowed the model to capture differences in coefficient values for the two different  
23 delay conditions. All model coefficients were assumed to be drawn from prior  
24 distributions and for all coefficients other than the intercept (which captured overall  
25 memory scores) prior distributions were centered on zero. The code used to specify the  
26 hierarchical model is included as supplementary code.

## 30 **Experiment 2**

### 32 **Experimental procedure**

34 In experiment 2, the learning task was modified to dissociate reward rate from reward  
35 prediction error. The reward probability of the two image categories (living vs. nonliving)  
36 were independent and set to either 0.8 or 0.2, allowing for a 2x2 design (0.8/0.8, 0.8/0.2,  
37 0.2/0.8, 0.2/0.2; Figure 7a). Change-points occurred with a probability 0.05 on every trial  
38 for the two categories independently. Change points did not occur for the first 20 trials of  
39 the task and the first 20 trials following a change point. Tasks were generated to contain  
40 at least one block of each trial type in the 2x2 design. Each subject completed a unique  
41 task with pseudorandomized order of images that followed these constraints. The task  
42 instructions explicitly stated that the two image categories had independent reward  
43 probabilities that need to be tracked separately. The rest of the task, including the  
44 recognition memory portion, was identical to that of Experiment 1.

1  
2  
3  
4  
5  
6  
7  
8  
9  
10  
11  
12  
13  
14  
15  
16  
17  
18  
19  
20  
21  
22  
23  
24  
25  
26  
27  
28  
29  
30  
31  
32  
33  
34  
35  
36  
37  
38  
39  
40  
41  
42  
43  
44

## **Subjects**

A total of 279 subjects (157, no delay condition; 122, 24hr-delay condition) completed the task via Amazon Mechanical Turk. 105 subjects (64, no delay; 41, 24hr-delay) were excluded from analysis because they previously completed a prior version of the task or didn't meet our criteria of above-chance performance in the learning task. Therefore, the final sample had a total of 174 subjects (93, no delay, 81, 24hr-delay; 101 males, 71 females, 2 no response) with the age of  $34.0 \pm 9.1$  (mean  $\pm$  SD). Informed consent was obtained in a manner approved by the Brown University Institutional Review Board.

## **Data availability**

The data from both experiments and the scripts used to analyze and model the data are available from the authors upon request.

## **Author Contributions**

All authors designed the experiment and wrote the manuscript. AIJ collected the data and MRN developed the computational models. MRN and AIJ designed and performed behavioral analysis.

## **Competing Interests**

None of the authors have any competing interests to report, financial or otherwise.

## **Acknowledgements**

We thank Anne Collins for helpful comments on the experimental design. This work was funded by NIH grants F32MH102009 and K99AG054732 (MRN), NIMH R01 MH080066-01 and NSF Proposal #1460604 (MJF), and R00MH094438 (DGD). The funders had no role in study design, data collection and analysis, decision to publish or preparation of the manuscript.

1  
2  
3  
4  
5  
6  
7  
8  
9  
10  
11  
12  
13  
14  
15  
16  
17  
18  
19  
20  
21  
22  
23  
24  
25  
26  
27  
28  
29  
30  
31  
32  
33  
34  
35  
36  
37  
38  
39  
40  
41  
42  
43  
44

**Reference:**

1. Sutton, R. & Barto, A. *Reinforcement learning: An introduction*. (MIT Press, 1998).
2. Schacter, D. L. & Tulving, E. *Memory Systems 1994*. (MIT Press, 1994).
3. McClelland, J. L., McNaughton, B. L. & O'Reilly, R. C. Why there are complementary learning systems in the hippocampus and neocortex: insights from the successes and failures of connectionist models of learning and memory. *Psychological Review* **102**, 419–457 (1995).
4. O'Reilly, R. C. & Rudy, J. W. Conjunctive representations in learning and memory: principles of cortical and hippocampal function. *Psychological Review* **108**, 311–345 (2001).
5. Schultz, W. A Neural Substrate of Prediction and Reward. *Science* **275**, 1593–1599 (1997).
6. Frank, M. J. By Carrot or by Stick: Cognitive Reinforcement Learning in Parkinsonism. *Science* **306**, 1940–1943 (2004).
7. O'Doherty, J. *et al.* Dissociable roles of ventral and dorsal striatum in instrumental conditioning. *Science* **304**, 452–454 (2004).
8. Sohal, V. S., Zhang, F., Yizhar, O. & Deisseroth, K. Parvalbumin neurons and gamma rhythms enhance cortical circuit performance. *Nature* **459**, 698–702 (2009).
9. Squire, L. R. Memory and the hippocampus: a synthesis from findings with rats, monkeys, and humans. *Psychological Review* **99**, 195–231 (1992).
10. Nadel, L. & Moscovitch, M. Memory consolidation, retrograde amnesia and the hippocampal complex. *Current Opinion in Neurobiology* **7**, 217–227 (1997).
11. Wan, H., Aggleton, J. P. & Brown, M. W. Different contributions of the hippocampus and perirhinal cortex to recognition memory. *J. Neurosci.* **19**, 1142–1148 (1999).
12. Eichenbaum, H., Yonelinas, A. P. & Ranganath, C. The medial temporal lobe and recognition memory. *Annu. Rev. Neurosci.* **30**, 123–152 (2007).
13. Heilbronner, S. R., Rodriguez-Romaguera, J., Quirk, G. J., Groenewegen, H. J. & Haber, S. N. Circuit-Based Corticostriatal Homologies Between Rat and Primate. *Biol. Psychiatry* **80**, 509–521 (2016).
14. Thierry, A. M., Gioanni, Y., Dégénétais, E. & Glowinski, J. Hippocampo-prefrontal cortex pathway: anatomical and electrophysiological characteristics.

- 1        *Hippocampus* **10**, 411–419 (2000).
- 2    15. Atallah, H. E., Frank, M. J. & O'Reilly, R. C. Hippocampus, cortex, and basal  
3        ganglia: insights from computational models of complementary learning systems.  
4        *Neurobiol Learn Mem* **82**, 253–267 (2004).
- 5    16. Eichenbaum, H. Prefrontal–hippocampal interactions in episodic memory. *Nature*  
6        *Reviews Neuroscience* **18**, 547–558 (2017).
- 7    17. Floresco, S. B. Dopaminergic regulation of limbic-striatal interplay. *J Psychiatry*  
8        *Neurosci* **32**, 400–411 (2007).
- 9    18. Shohamy, D. & Adcock, R. A. Dopamine and adaptive memory. *Trends in*  
10        *Cognitive Sciences* **14**, 464–472 (2010).
- 11   19. Montague, P. R., Dayan, P. & Sejnowski, T. J. A framework for mesencephalic  
12        dopamine systems based on predictive Hebbian learning. *J. Neurosci.* **16**, 1936–  
13        1947 (1996).
- 14   20. Steinberg, E. E. *et al.* A causal link between prediction errors, dopamine neurons  
15        and learning. *Nature Publishing Group* **16**, 966–973 (2013).
- 16   21. Berridge, K. C. & Robinson, T. E. What is the role of dopamine in reward: hedonic  
17        impact, reward learning, or incentive salience? *Brain Research Reviews* **28**, 309–  
18        369 (1998).
- 19   22. Fiorillo, C. D., Tobler, P. N. & Schultz, W. Discrete coding of reward probability  
20        and uncertainty by dopamine neurons. *Science* (2003).
- 21   23. Dagher, A. The role of dopamine in risk taking: a specific look at Parkinson's  
22        disease and gambling. 1–12 (2014). doi:10.3389/fnbeh.2014.00196/abstract
- 23   24. Stopper, C. M., Tse, M. T. L., Montes, D. R., Wiedman, C. R. & Floresco, S. B.  
24        Overriding Phasic Dopamine Signals Redirects Action Selection during  
25        Risk/Reward Decision Making. *Neuron* 1–13 (2014).  
26        doi:10.1016/j.neuron.2014.08.033
- 27   25. Collins, A. G. E. & Frank, M. J. Opponent actor learning (OpAL): modeling  
28        interactive effects of striatal dopamine on reinforcement learning and choice  
29        incentive. *Psychological Review* **121**, 337–366 (2014).
- 30   26. Zalocusky, K. A. *et al.* Nucleus accumbens D2R cells signal prior outcomes and  
31        control risky decision-making. *Nature* **531**, 642–646 (2016).
- 32   27. Rutledge, R. B., Skandali, N., Dayan, P. & Dolan, R. J. Dopaminergic Modulation  
33        of Decision Making and Subjective Well-Being. *Journal of Neuroscience* **35**,  
34        9811–9822 (2015).
- 35   28. Bouret, S. & Sara, S. J. Network reset: a simplified overarching theory of locus  
36        coeruleus noradrenaline function. *Trends in Neurosciences* **28**, 574–582 (2005).
- 37   29. Yu, A. J. & Dayan, P. Uncertainty, neuromodulation, and attention. *Neuron* **46**,  
38        681–692 (2005).
- 39   30. Nassar, M. R. *et al.* Rational regulation of learning dynamics by pupil-linked  
40        arousal systems. *Nature Neuroscience* **15**, 1040–1046 (2012).
- 41   31. McGuire, J. T., Nassar, M. R., Gold, J. I. & Kable, J. W. Functionally dissociable  
42        influences on learning rate in a dynamic environment. *Neuron* **84**, 870–881  
43        (2014).
- 44   32. Lisman, J. E. & Grace, A. A. The Hippocampal-VTA Loop: Controlling the Entry of

- 1 Information into Long-Term Memory. *Neuron* **46**, 703–713 (2005).
- 2 33. Wittmann, B. C. *et al.* Reward-Related fMRI Activation of Dopaminergic Midbrain  
3 Is Associated with Enhanced Hippocampus- Dependent Long-Term Memory  
4 Formation. *Neuron* **45**, 459–467 (2005).
- 5 34. Tully, K. & Bolshakov, V. Y. Emotional enhancement of memory: how  
6 norepinephrine enables synaptic plasticity. *Mol Brain* **3**, 15 (2010).
- 7 35. Rosen, Z. B., Cheung, S. & Siegelbaum, S. A. Midbrain dopamine neurons  
8 bidirectionally regulate CA3-CA1 synaptic drive. *Nature Publishing Group* **18**,  
9 1763–1771 (2015).
- 10 36. Lemon, N. & Manahan-Vaughan, D. Dopamine D1/D5 Receptors Gate the  
11 Acquisition of Novel Information through Hippocampal Long-Term Potentiation  
12 and Long-Term Depression. *Journal of Neuroscience* **26**, 7723–7729 (2006).
- 13 37. McNamara, C. G., Tejero-Cantero, Á., Trouche, S., Campo-Urriza, N. & Dupret, D.  
14 Dopaminergic neurons promote hippocampal reactivation and spatial memory  
15 persistence. *Nature Publishing Group* **17**, 1658–1660 (2014).
- 16 38. Gan, J. O., Walton, M. E. & Phillips, P. E. M. Dissociable cost and benefit  
17 encoding of future rewards by mesolimbic dopamine. *Nature Neuroscience* **13**,  
18 25–27 (2009).
- 19 39. Bayer, H. M. & Glimcher, P. W. Midbrain Dopamine Neurons Encode a  
20 Quantitative Reward Prediction Error Signal. *Neuron* **47**, 129–141 (2005).
- 21 40. Bethus, I., Tse, D. & Morris, R. G. M. Dopamine and Memory: Modulation of the  
22 Persistence of Memory for Novel Hippocampal NMDA Receptor-Dependent  
23 Paired Associates. *Journal of Neuroscience* **30**, 1610–1618 (2010).
- 24 41. Murty, V. P. & Adcock, R. A. Enriched Encoding: Reward Motivation Organizes  
25 Cortical Networks for Hippocampal Detection of Unexpected Events. *Cerebral*  
26 *Cortex* **24**, 2160–2168 (2013).
- 27 42. Murty, V. P., Tompary, A., Adcock, R. A. & Davachi, L. Selectivity in Postencoding  
28 Connectivity with High-Level Visual Cortex Is Associated with Reward-Motivated  
29 Memory. *Journal of Neuroscience* **37**, 537–545 (2017).
- 30 43. Wimmer, G. E., Braun, E. K., Daw, N. D. & Shohamy, D. Episodic Memory  
31 Encoding Interferes with Reward Learning and Decreases Striatal Prediction  
32 Errors. *Journal of Neuroscience* **34**, 14901–14912 (2014).
- 33 44. Rouhani, N., Norman, K. A. & Niv, Y. Dissociable effects of surprising rewards on  
34 learning and memory. *J Exp Psychol Learn Mem Cogn* (2018).  
35 doi:10.1037/xlm0000518
- 36 45. Preuschoff, K. Pupil dilation signals surprise: evidence for noradrenaline’s role in  
37 decision making. 1–12 (2011). doi:10.3389/fnins.2011.00115/abstract
- 38 46. Behrens, T. E. J., Woolrich, M. W., Walton, M. E. & Rushworth, M. F. S. Learning  
39 the value of information in an uncertain world. *Nature Neuroscience* **10**, 1214–  
40 1221 (2007).
- 41 47. Nassar, M. R., Wilson, R. C., Heasly, B. & Gold, J. I. An approximately Bayesian  
42 delta-rule model explains the dynamics of belief updating in a changing  
43 environment. *Journal of Neuroscience* **30**, 12366–12378 (2010).
- 44 48. Nassar, M. R. *et al.* Age differences in learning emerge from an insufficient

- 1 representation of uncertainty in older adults. *Nature Communications* **7**, 11609  
2 (2016).
- 3 49. Cohen, J. Y., Haesler, S., Vong, L., Lowell, B. B. & Uchida, N. Neuron-type-  
4 specific signals for reward and punishment in the ventral tegmental area. *Nature*  
5 **482**, 85–88 (2012).
- 6 50. Rutledge, R. B., Dean, M., Caplin, A. & Glimcher, P. W. Testing the Reward  
7 Prediction Error Hypothesis with an Axiomatic Model. *Journal of Neuroscience* **30**,  
8 13525–13536 (2010).
- 9 51. Sadacca, B. F., Jones, J. L. & Schoenbaum, G. Midbrain dopamine neurons  
10 compute inferred and cached value prediction errors in a common framework.  
11 *Elife* **5**, (2016).
- 12 52. Frey, U. & Morris, R. G. Synaptic tagging: implications for late maintenance of  
13 hippocampal long-term potentiation. *Trends in Neurosciences* **21**, 181–188  
14 (1998).
- 15 53. Stanek, J. K., Dickerson, K. C., Chiew, K. S., Clement, N. J. & Adcock, R. A.  
16 Expected reward value and reward uncertainty have temporally dissociable  
17 effects on memory formation. doi:10.1101/280164
- 18 54. Koster, R., Guitart-Masip, M., Dolan, R. J. & Düzel, E. Basal Ganglia Activity  
19 Mirrors a Benefit of Action and Reward on Long-Lasting Event Memory. *Cerebral*  
20 *Cortex* **25**, 4908–4917 (2015).
- 21 55. Long, N. M., Lee, H. & Kuhl, B. A. Hippocampal Mismatch Signals Are Modulated  
22 by the Strength of Neural Predictions and Their Similarity to Outcomes. *Journal of*  
23 *Neuroscience* **36**, 12677–12687 (2016).
- 24 56. Greve, A., Cooper, E., Kaula, A., Anderson, M. C. & Henson, R. Journal of  
25 Memory and Language. *Journal of Memory and Language* **94**, 149–165 (2017).
- 26 57. Schwartz, G. Estimating the Dimension of a Model. *The Annals of Statistics* **6**,  
27 461–464 (1978).
- 28 58. Carpenter, B. *et al.* Stan: A Probabilistic Programming Language. *J. Stat. Soft.* **76**,  
29 (2017).
- 30  
31  
32  
33  
34  
35  
36  
37  
38  
39  
40  
41  
42  
43  
44

1  
2  
3  
4  
5  
6  
7  
8  
9  
10  
11

Supplementary figures:

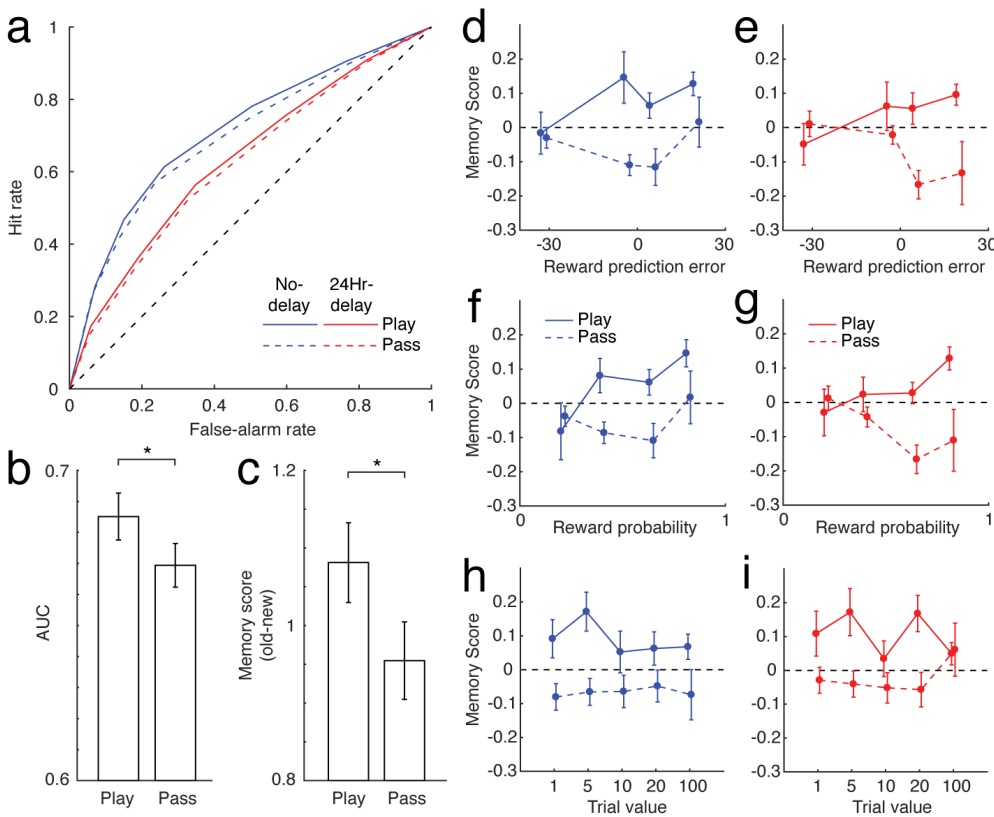

12  
13  
14  
15  
16  
17  
18  
19  
20  
21  
22  
23  
24  
25  
26

**Supplementary figure 1** Replication of main effects after omitting all trials in which subsequent memory had low confidence (“guess”). To rule out the possibility that low confidence trials are driving our results or adding unnecessary noise, we repeated the main findings of the study after omitting all trials in which the confidence score was 1 (both target and foil). (a) The ROC curves for play/pass trials. (b) Area under the ROC curve was greater for play versus pass ( $t(198) = 2.78, p = 0.0060$ ; group difference,  $t(197) = -0.083, p = 0.93$ ). (c) Mean pairwise difference in memory score between the “old” images and their semantically-matched foil images was greater for play versus pass ( $t(197) = 3.49, p < 0.001$ ; group difference,  $t(196) = 0.89, p = 0.37$ ). (d,e) Positive relationship between imRPE and subsequent memory ( $t(198)=2.48, p=0.014$ ; group difference,  $t(197)=-0.33, p=0.74$ ). (f,g) Positive relationship between reward probability and subsequent memory ( $t(198)=2.99, p=0.0031$ , group difference,  $t(197)=0.078, p=0.94$ ). (h,i) No relation between reward value and subsequent memory ( $t(198)=-1.74, p=0.084$ , group difference,  $t(197)=0.82, p=0.41$ ).



1  
2

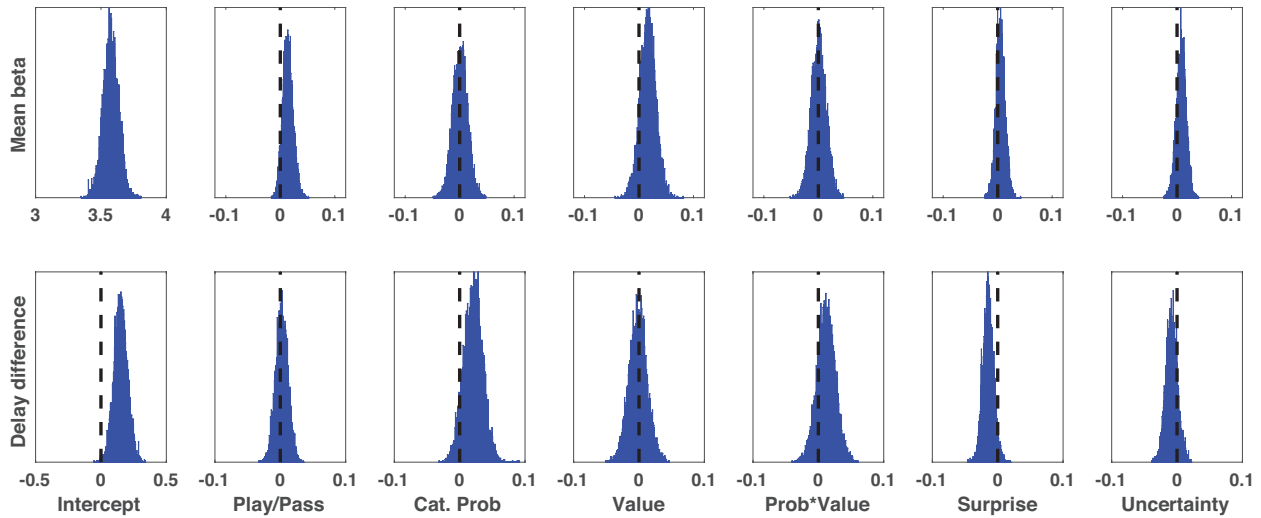

3  
4 **Supplementary figure 2:** Hierarchical regression estimating memory scores for foil items. Posterior  
5 probability densities for mean predictor coefficients ( $\mu_x$ ; top row) and delay condition parameter difference  
6 ( $D_x$ ; bottom row) estimated through MCMC sampling over the graphical model described in figure 6A  
7 informed by data for foil items semantically matched to the images presented in the decision making task.  
8 Unlike fits to the target items (Figure 6B), coefficients for task predictors related to reward probability and  
9 play/pass did not deviate appreciably from zero. However, delay condition difference coefficients were  
10 positive for the intercept term, indicating that subjects in the 24 hour delay condition tended to report  
11 higher memory scores for foils, consistent with the poorer discriminability in the 24 hour delay condition  
12 (see figure 3C).

13  
14  
15  
16  
17  
18  
19  
20  
21  
22  
23  
24  
25  
26  
27

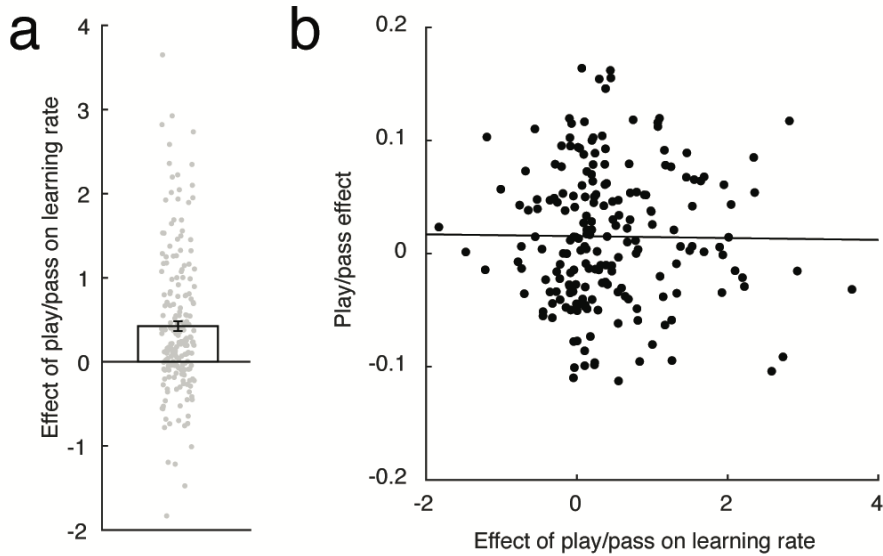

1  
2 **Supplementary figure 3** Subject learning rates differed across choice conditions but this difference did  
3 not predict the strength of choice effects on subsequent memory. **a:** Parameter estimates quantifying the  
4 degree to which learning rate is modulated by subject play/pass decisions in the choice model (positive  
5 values indicate more learning on after play decisions) for all subjects in experiment 1 (gray points) and the  
6 mean/SEM values across subjects (bar/error line; mean parameter estimate = 0.42,  $t = 7.18$ ,  $p < 0.001$ ).  
7 **b:** The degree to which subjects (black points) adjusted learning rate according to play/pass behavior  
8 (abscissa) showed no association with the degree to which they enhanced memory of items presented on  
9 play trials (ordinate; spearman  $\rho = 0.045$ ,  $p = 0.53$ ).

10  
11  
12  
13  
14  
15  
16  
17  
18  
19  
20  
21  
22  
23  
24  
25

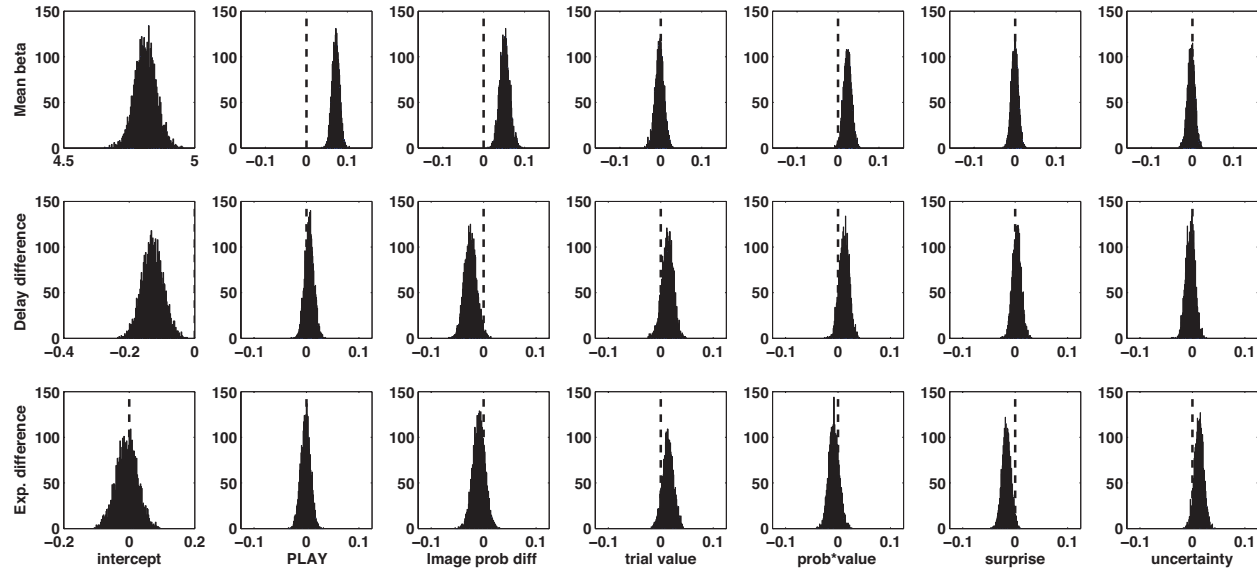

1  
2 **Supplementary figure 4** Coefficient estimates for hierarchical model fit to all subjects across both  
3 experiments. **Top:** Posterior probability density over mean coefficient estimates at the population level for  
4 each parameter in the hierarchical model fit to subject memory scores. Leftmost column reflects the  
5 intercept indicating overall memory scores for old items, whereas all other columns reflect the degree to  
6 which learning task-related factors affected subsequent memory. The model included two separate terms  
7 to model the probability associated with the shown image category (“cat prob(play)”); third column) and the  
8 probability associated with the non-displayed image category (“non-cat prob(play)”); fourth column) despite  
9 the fact that these two terms were perfectly anti-correlated for all participants who completed experiment  
10 1. **Middle:** Posterior probability density over delay difference estimates for each parameter in the  
11 hierarchical model. **Bottom:** Posterior probability density over experiment difference estimates quantifying  
12 the difference in coefficient values across the two experiments for each parameter in the hierarchical  
13 model.

14  
15  
16  
17  
18  
19

4/15/18 4:05 PM /.../hierarchicalModSpecForPub.m 1 of 2

```
%% Specify hierarchical model:
mem_code = {
  'data {'
  '  int<lower=0> S; ' % Number of subjects
  '  int<lower=0> TPS; ' % trials per subject
  '  int<lower=0> N; ' % Number of trials
  '  int<lower=0> Ps; ' % number of predictors
  '  int<lower=0> Is; ' % number of items/foils
  '  vector[TPS] memScore[S]; // memory score 1-8 ' % single array of k
vectors
  '  matrix[N,Ps] predMat; // predictor matrix ' % predictor matrix
  '  matrix[N,Is] itemPredMat; // item predictor matrix ' % predictor k
matrix
  '  int delay[S];'
  '}'
  'transformed data {' % ok, wouldn't have thought this necessary, send k
data in two dimensions and convert to 3...
  'matrix[TPS,Ps] predMatSub[S];'
  'matrix[TPS,Is] itemPredMatSub[S];'
  '  for (t in 1:TPS) {'
  '    for (s in 1:S) {'
  '      for (p in 1:Ps) {'
  '        predMatSub[s, t, p]<-predMat[(s-1)*TPS+t, p];'
  '      }'
  '    }
  '    for (i in 1:Is) {'
  '      itemPredMatSub[s, t,i]<-itemPredMat[(s-1)*TPS+t, i];'
  '    }
  '  }
  '}'
  'parameters {' % OK, we need mean and variance of coefficients
  '  vector[Ps] group_beta_mu; '
  '  vector[Ps] delayBetaOffset; ' % how much does group beta get k
pushed around by delay condition?
  '  vector <lower=0> [Ps] group_beta_sigma; '
  '  vector[Ps] sub_betas[S]; '
  '  real <lower=0> item_sigma;'
  '  real <lower=0> group_gammaScale;'
  '  real <lower=0> group_gammaShape;'
  '  real <lower=0> sub_sigmas[S]; '
  '  vector[Is] itemBs; '
  '}'
  'transformed parameters {'
  '  real <lower=0> sub_sigmaSquared[S]; '
  '  for (s in 1:S) {'
  '    sub_sigmaSquared[s]<-pow(sub_sigmas[s],2);'
  '  }
  '}'
  'model {'
  '  group_beta_mu[1] ~ normal(4.5, 2);' % Group mean for intercept k
term -- somewhere around avg memory score
  '  group_beta_sigma[1] ~ gamma(1, 1);' % Group sigma for k
intercept term
  '  delayBetaOffset[1] ~ cauchy(0, 1);' % relatively stiff prior k
over the conditional difference.
  '  group_gammaScale ~ cauchy(0,3);' % gamma distribution over k
subject variance gamma distribution (Scale parameter)
  '  group_gammaShape ~ cauchy(0,3);' % gamma distribution over k
subject variance gamma distribution (Shape parameter)
  '  item_sigma ~ cauchy(0,1);' % prior over variance
```

4/15/18 4:05 PM /.../hierarchicalModSpecForPub.m 2 of 2

```
' for (p in 2:Ps) {'
'   group_beta_mu[p] ~ normal(0, 2);' % prior on group mean beta
for each predictor -- set to zero with some variance
'   group_beta_sigma[p] ~ gamma(1, 1);' % prior on group sigma for
each predictor -- set wide gamma dist
'   delayBetaOffset[p] ~ cauchy(0, .3);' % Set stiff prior on the
delay condition effects for each parameter.
' }'
' for (i in 1:Is) {'
'   itemBs[i] ~ normal(0, item_sigma);' % mean item effect is
zero, variance half cauchy distributed.
' }' %
' for (s in 1:S) {'
'   for (p in 1:Ps) {'
'     sub_betas[s,p] ~ normal(group_beta_mu[p]+ delay[s] *
delayBetaOffset[p] , group_beta_sigma[p]);'
'   }'
'   sub_sigmaSquared[s] ~ gamma(group_gammaShape,
group_gammaScale);'
'   memScore[s] ~ normal(predMatSub[s] * sub_betas[s] +
itemPredMatSub[s] * itemBs , sub_sigmas[s]);'
' }'
' }'
};

% Need to add sigmas for each subject...

fit = stan('model_code',mem_code,'data', mem_data, 'verbose', true, 'init',
0, 'warmup', 1000, 'chains', 4, 'iter', 2000, 'algorithm', 'NUTS');

print(fit);
```

1  
2 **Supplementary code:** Hierarchical regression model for experiment 1 spefified in matlabStan. All code  
3 and data will be available by the authors upon request.  
4  
5  
6  
7  
8  
9  
10  
11  
12  
13  
14  
15  
16
